# Supplementary material for: Epigenetic Aging in Major Depressive Disorder
Source: Atypon-hosted journal article supplement (doi:10.1176/appi.ajp.2018.17060595), 2018-04-16
Supplement: appi.ajp.2018.17060595.ds002.tables1.csv [file appi.ajp.2018.17060595.ds002.tables1.csv]

TABLE S1. Overview of the 80,000 CpG sites used to estimate DNA methylation age
in blood samples of patients with major depressive disorder and controls in the
Netherlands Study of Depression and Anxiety
chr	position	t_stat	p_value
11	57672164	-20.66612692	1.63E-80
11	57672169	-20.37061459	1.34E-78
11	57672092	-19.20762193	3.38E-71
5	16179300	19.20345208	3.59E-71
5	16179294	19.14357638	8.52E-71
5	16179303	19.11753084	1.24E-70
5	16179287	19.05698846	2.97E-70
5	16179296	19.03524976	4.06E-70
5	16179290	18.95442348	1.30E-69
5	16179282	18.9203302	2.11E-69
5	16179279	18.9114687	2.40E-69
5	16179307	18.90717588	2.55E-69
11	57672079	-18.79727116	1.23E-68
19	18344113	18.77283463	1.74E-68
19	18344107	18.74355293	2.65E-68
19	18344125	18.7178657	3.82E-68
5	16179309	18.71374038	4.05E-68
5	16179312	18.59672122	2.14E-67
19	18344127	18.59145944	2.31E-67
19	18344130	18.58163313	2.66E-67
11	57671953	-18.47953877	1.13E-66
5	16179267	18.44281286	1.90E-66
11	57671920	-18.38930914	4.05E-66
11	57671962	-18.38002956	4.62E-66
11	57672200	-18.36412244	5.79E-66
12	21928694	-18.31946245	1.09E-65
11	57671966	-18.30205045	1.39E-65
19	18344068	18.26338125	2.39E-65
19	18344095	18.2334498	3.65E-65
5	16179262	18.21200395	4.93E-65
5	16179256	18.20619383	5.35E-65
12	21928710	-18.19411407	6.34E-65
5	16179327	18.14482408	1.27E-64
7	130418738	18.13832447	1.39E-64
11	75141018	18.13744925	1.41E-64
11	57671908	-18.11686247	1.88E-64
5	16179260	18.0848154	2.94E-64
12	21928715	-18.05957432	4.19E-64
19	18344061	18.03956094	5.54E-64
7	130418723	17.99100031	1.09E-63
5	16179349	17.98836754	1.13E-63
7	130418746	17.95221773	1.88E-63
19	18344058	17.93808685	2.28E-63
7	130418726	17.9346304	2.40E-63
19	18344084	17.88990716	4.47E-63
5	16179333	17.87451947	5.54E-63
5	16179340	17.85439746	7.33E-63
5	16179355	17.83163651	1.01E-62
19	18344078	17.75677985	2.84E-62
19	18344048	17.7355698	3.81E-62
11	57671449	-17.69986613	6.25E-62
19	18344042	17.68766852	7.40E-62
5	16179242	17.68695934	7.48E-62
11	75141010	17.68006211	8.23E-62
19	18344054	17.63916458	1.45E-61
7	130418720	17.62190595	1.84E-61
7	130418717	17.56642266	3.95E-61
11	75140993	17.47696069	1.35E-60
11	57671405	-17.45366459	1.86E-60
5	16179362	17.4432256	2.15E-60
11	75141001	17.44126866	2.21E-60
7	130418771	17.43839302	2.30E-60
7	130418774	17.42173173	2.89E-60
7	130418764	17.41957369	2.98E-60
11	75141029	17.41572741	3.14E-60
7	130418756	17.40288244	3.74E-60
7	130418702	17.3851528	4.77E-60
11	57671460	-17.36954657	5.91E-60
9	136474378	17.36135698	6.61E-60
7	130418758	17.35728459	6.99E-60
19	18344144	17.3234087	1.11E-59
9	136474386	17.31387756	1.27E-59
11	75140996	17.31359825	1.27E-59
7	130418798	17.27037953	2.29E-59
5	16179367	17.25746133	2.74E-59
7	130418778	17.20091142	5.91E-59
11	57671403	-17.19740459	6.20E-59
5	16179378	17.19598329	6.33E-59
11	75140991	17.18977904	6.88E-59
9	136474392	17.189608	6.90E-59
7	130418821	17.18834331	7.02E-59
7	130418800	17.13599863	1.43E-58
7	130418794	17.12511065	1.66E-58
7	130418678	17.12395227	1.69E-58
7	130418633	17.12290367	1.71E-58
7	130418710	17.10624279	2.14E-58
5	16179225	17.10309758	2.24E-58
7	130418635	17.10006224	2.33E-58
12	21928661	-17.06288185	3.86E-58
7	130418781	17.03842258	5.38E-58
5	16179212	17.03489226	5.64E-58
11	75141038	17.02152164	6.76E-58
5	16179210	17.00653581	8.28E-58
7	130418696	16.99372751	9.85E-58
7	130418680	16.939904	2.04E-57
11	75140988	16.92952353	2.34E-57
7	130418791	16.92559797	2.47E-57
19	18344003	16.91988279	2.67E-57
7	130418824	16.90696655	3.18E-57
11	75141040	16.90233377	3.38E-57
2	66654518	-16.90069132	3.46E-57
9	136474402	16.89283382	3.85E-57
5	16179391	16.88710458	4.15E-57
7	130418660	16.87950175	4.60E-57
2	66654515	-16.8230836	9.84E-57
7	130418675	16.79519288	1.43E-56
7	130418638	16.79348694	1.46E-56
5	16179384	16.77444208	1.89E-56
5	16179387	16.72727448	3.56E-56
7	130418687	16.72569531	3.64E-56
11	57671401	-16.72304691	3.77E-56
9	136474367	16.71648495	4.11E-56
2	66654495	-16.70644264	4.71E-56
5	16179118	16.68522084	6.25E-56
5	16179219	16.66197114	8.53E-56
7	130418650	16.6521131	9.73E-56
7	130418629	16.64871975	1.02E-55
11	75141047	16.64426626	1.08E-55
11	75141042	16.64035697	1.14E-55
9	136474351	16.55175888	3.71E-55
9	136474355	16.54947434	3.83E-55
5	16179394	16.54616306	4.00E-55
11	75140983	16.53964509	4.36E-55
8	50937344	-16.5104188	6.44E-55
14	93389691	16.50884953	6.57E-55
9	136474346	16.50557655	6.87E-55
14	93389688	16.49160696	8.27E-55
8	50937321	-16.48959427	8.49E-55
5	16179222	16.48809835	8.66E-55
7	130418827	16.48006686	9.64E-55
7	130418626	16.47636506	1.01E-54
5	16179112	16.43935789	1.65E-54
14	93389695	16.38135069	3.57E-54
14	93389677	16.30037553	1.04E-53
9	136474342	16.2842513	1.29E-53
11	75141054	16.27901427	1.38E-53
7	130418623	16.26755992	1.60E-53
5	16179127	16.23907089	2.33E-53
11	57671479	-16.23367725	2.51E-53
16	2042585	16.23008389	2.63E-53
7	130418621	16.22735678	2.72E-53
5	16179135	16.22551668	2.79E-53
16	2042588	16.21597109	3.16E-53
19	18343980	16.21572287	3.17E-53
19	18343949	16.20246249	3.78E-53
14	93389666	16.18684916	4.64E-53
14	93389701	16.1847904	4.77E-53
11	75141056	16.15955905	6.64E-53
19	18343983	16.14791341	7.74E-53
2	66654451	-16.14416363	8.13E-53
8	50937303	-16.13799369	8.81E-53
16	2042579	16.13026436	9.75E-53
8	50937456	-16.11807186	1.14E-52
16	2042575	16.10101641	1.43E-52
5	16179156	16.0944906	1.56E-52
16	2042560	16.09336309	1.58E-52
11	75140980	16.09207274	1.61E-52
15	31775890	16.07048815	2.13E-52
5	16179154	16.05840906	2.50E-52
8	50937446	-16.04336495	3.04E-52
5	16179101	16.03738708	3.29E-52
9	136474423	16.00337289	5.13E-52
15	31775869	15.99301467	5.87E-52
2	66654531	-15.98690632	6.36E-52
14	93389716	15.97835005	7.11E-52
14	93389713	15.97663061	7.27E-52
19	18343943	15.95737724	9.34E-52
7	130418843	15.95676907	9.41E-52
9	136474421	15.95310103	9.88E-52
5	16179099	15.93132836	1.31E-51
14	93389708	15.92346834	1.45E-51
15	31775884	15.92187335	1.48E-51
11	75140978	15.9096851	1.74E-51
9	136474428	15.90113757	1.94E-51
15	31775863	15.897967	2.02E-51
5	16179138	15.88185649	2.49E-51
15	31775873	15.87719847	2.65E-51
19	18343937	15.77992094	9.35E-51
7	130418848	15.77916363	9.44E-51
15	31775860	15.76507715	1.13E-50
5	16179096	15.75971244	1.21E-50
15	31775835	15.74877268	1.40E-50
15	31775845	15.74573357	1.45E-50
15	31775899	15.73820292	1.60E-50
16	2042598	15.72822713	1.82E-50
19	18343941	15.7227197	1.96E-50
9	136474640	15.72211764	1.97E-50
9	136474476	15.70271622	2.53E-50
15	31775842	15.69343517	2.86E-50
15	31775838	15.69298502	2.87E-50
15	31775903	15.68636329	3.13E-50
15	31775895	15.68134437	3.34E-50
9	136474630	15.67788155	3.49E-50
11	75141063	15.67136014	3.80E-50
9	136474474	15.65879414	4.46E-50
9	136474527	15.65142581	4.91E-50
16	2042539	15.64496177	5.33E-50
9	136474472	15.63597528	5.99E-50
7	130418599	15.62413328	6.97E-50
5	16179408	15.61570737	7.77E-50
16	2042551	15.610789	8.27E-50
15	31775840	15.60863744	8.51E-50
15	31775832	15.60700181	8.69E-50
16	2042600	15.59674231	9.91E-50
9	136474319	15.59172948	1.06E-49
19	18344178	15.58760382	1.11E-49
9	136474463	15.58275538	1.19E-49
9	136474440	15.57603131	1.29E-49
15	31775916	15.57103526	1.38E-49
9	136474626	15.56043059	1.58E-49
7	130418851	15.55530311	1.69E-49
15	31775601	15.55307553	1.74E-49
9	136474497	15.53910916	2.08E-49
9	136474493	15.53640608	2.15E-49
9	136474636	15.53391209	2.22E-49
15	31775825	15.53273782	2.25E-49
15	31775623	15.53040199	2.32E-49
8	50937289	-15.52914544	2.36E-49
15	31775615	15.50831447	3.08E-49
9	136474574	15.50445061	3.23E-49
15	31775612	15.50337404	3.28E-49
9	136474577	15.49857332	3.49E-49
15	31775603	15.49637955	3.59E-49
9	136474621	15.49073055	3.86E-49
15	31775803	15.47982794	4.43E-49
9	136474525	15.46133882	5.61E-49
9	136474514	15.46132445	5.61E-49
15	31775920	15.45773037	5.88E-49
9	136474449	15.45338319	6.21E-49
9	136474568	15.44498096	6.92E-49
15	31775808	15.44441497	6.97E-49
9	136474432	15.42290518	9.16E-49
9	136474523	15.42109486	9.38E-49
9	136474434	15.41917727	9.61E-49
14	93389651	15.41360365	1.03E-48
15	31775629	15.41093827	1.07E-48
9	136474316	15.40920192	1.09E-48
16	2042607	15.3998595	1.23E-48
12	81373768	-15.39731737	1.27E-48
9	136474647	15.39174262	1.36E-48
9	136474325	15.39088567	1.38E-48
15	31775820	15.39031915	1.39E-48
15	31775908	15.38032329	1.58E-48
9	136474531	15.37598709	1.67E-48
15	31775793	15.371516	1.76E-48
15	31775797	15.35515948	2.17E-48
12	81373763	-15.35399546	2.20E-48
9	136474506	15.34317368	2.53E-48
15	31775923	15.33130664	2.94E-48
11	75140968	15.31913058	3.43E-48
9	136474444	15.31811435	3.48E-48
15	31775795	15.29546308	4.63E-48
15	31775791	15.28411459	5.35E-48
9	136474649	15.28155475	5.53E-48
16	2042534	15.27765637	5.81E-48
9	136474593	15.27134727	6.29E-48
12	81373753	-15.26749318	6.61E-48
8	50937483	-15.26132269	7.14E-48
15	31775784	15.25775125	7.47E-48
9	136474504	15.25602112	7.64E-48
15	31775812	15.25369079	7.87E-48
9	136474587	15.25008706	8.23E-48
19	18343915	15.24800795	8.45E-48
9	136474566	15.23937542	9.43E-48
9	136474645	15.23512084	9.95E-48
9	136474508	15.22548957	1.12E-47
15	31775773	15.18995511	1.76E-47
15	31775749	15.16649566	2.37E-47
15	31775643	15.16446759	2.43E-47
15	31775634	15.16291633	2.48E-47
14	93389647	15.15748152	2.65E-47
9	136474564	15.08452374	6.65E-47
15	31775925	15.08082992	6.96E-47
15	31775652	15.07049068	7.93E-47
16	2042610	15.06895338	8.08E-47
13	49795147	15.06754829	8.23E-47
16	25063613	-15.04914109	1.04E-46
15	31775764	15.04414593	1.10E-46
16	50732366	-15.04138966	1.14E-46
16	25063616	-15.03169737	1.29E-46
15	31775639	15.02463992	1.41E-46
11	75140965	15.02374059	1.43E-46
15	31775929	14.98424106	2.34E-46
15	31775664	14.97940218	2.48E-46
21	16485480	-14.97636984	2.58E-46
15	31775718	14.97286764	2.70E-46
15	31775660	14.96564697	2.95E-46
9	136474547	14.95579642	3.34E-46
7	130418591	14.95453313	3.39E-46
7	130418855	14.94800858	3.68E-46
9	136474562	14.94496329	3.82E-46
15	31775755	14.9433688	3.90E-46
21	16485512	-14.93646686	4.25E-46
21	16485487	-14.93467885	4.34E-46
15	31775712	14.93410938	4.37E-46
21	43022093	-14.93360563	4.40E-46
13	49795145	14.93134723	4.53E-46
9	136474540	14.92788856	4.73E-46
15	31775662	14.91836747	5.32E-46
19	18344184	14.91425387	5.61E-46
15	31775709	14.91422103	5.61E-46
15	31775656	14.91156861	5.80E-46
15	31775767	14.90148802	6.57E-46
5	16179411	14.89726665	6.93E-46
21	43022099	-14.89539936	7.09E-46
14	93389640	14.89396625	7.22E-46
15	31775934	14.89159674	7.44E-46
21	43022102	-14.87992833	8.60E-46
15	31775745	14.8667264	1.01E-45
6	105388817	14.86397598	1.05E-45
15	31775668	14.86358586	1.05E-45
15	31775769	14.85793116	1.13E-45
14	93389628	14.85288994	1.20E-45
16	50732381	-14.85251011	1.21E-45
15	31775697	14.83659629	1.47E-45
13	49795132	14.83584663	1.49E-45
15	31775679	14.83055281	1.59E-45
15	31775671	14.81692886	1.88E-45
21	43022075	-14.7952335	2.46E-45
20	38478500	-14.79317239	2.53E-45
15	31775673	14.7876086	2.71E-45
9	136474557	14.78672383	2.74E-45
15	31775939	14.76934082	3.40E-45
19	18343901	14.76857048	3.43E-45
15	31775758	14.76850751	3.43E-45
13	49795139	14.75340878	4.14E-45
11	75141072	14.74558883	4.56E-45
14	93389740	14.74479486	4.61E-45
15	31775702	14.74436303	4.63E-45
15	31775676	14.74294183	4.71E-45
9	136474551	14.73474921	5.22E-45
2	66648458	-14.72435257	5.93E-45
9	136474549	14.72282072	6.05E-45
15	31775734	14.68969098	9.10E-45
15	31775943	14.63368002	1.82E-44
15	31775700	14.6032752	2.64E-44
13	49795126	14.59231885	3.02E-44
12	81373796	-14.58548997	3.29E-44
1	8086723	14.57884404	3.57E-44
9	136474696	14.57595639	3.70E-44
15	31775685	14.57458234	3.76E-44
6	105388826	14.56993801	3.98E-44
16	25063567	-14.54791895	5.22E-44
15	31775590	14.54347038	5.51E-44
14	93389743	14.54056326	5.71E-44
15	31775941	14.53916505	5.81E-44
13	49795156	14.53915701	5.81E-44
12	81373807	-14.53448407	6.15E-44
5	16179076	14.52235101	7.14E-44
13	49795129	14.51809585	7.52E-44
15	31775682	14.51599228	7.72E-44
5	16179069	14.50983217	8.32E-44
16	50732345	-14.49260264	1.03E-43
9	136474689	14.48411014	1.14E-43
7	130418869	14.47115951	1.34E-43
13	49795154	14.46972915	1.36E-43
13	49795159	14.44052737	1.94E-43
7	130418583	14.42831712	2.25E-43
16	2042618	14.42819453	2.26E-43
15	31775947	14.41497272	2.65E-43
1	8086719	14.4113674	2.77E-43
14	93389624	14.41080238	2.79E-43
13	49795120	14.39777743	3.27E-43
1	8086721	14.38662699	3.75E-43
20	38478453	-14.38477003	3.83E-43
15	31775583	14.37094716	4.54E-43
16	25063654	-14.36298375	5.00E-43
1	8086679	14.35724266	5.36E-43
1	8086672	14.34329324	6.35E-43
13	49795117	14.33364918	7.14E-43
9	136474708	14.33176988	7.30E-43
7	130418581	14.31976133	8.45E-43
15	31775950	14.31173296	9.32E-43
15	31775579	14.30258807	1.04E-42
11	75141083	14.2866863	1.26E-42
1	8086714	14.28343078	1.31E-42
13	49795111	14.27058048	1.53E-42
13	49795079	14.26846642	1.57E-42
13	49795172	14.26742742	1.59E-42
13	49795170	14.26449252	1.65E-42
16	50732341	-14.26119365	1.72E-42
15	31775577	14.24359017	2.13E-42
20	38478526	-14.24320703	2.14E-42
14	93389756	14.21031837	3.18E-42
6	105388807	14.20966248	3.21E-42
2	66648393	-14.19638569	3.76E-42
5	16179065	14.18387797	4.38E-42
1	8086712	14.18155167	4.50E-42
3	9594082	14.17986973	4.59E-42
14	80122573	-14.17365293	4.95E-42
19	18343892	14.17287591	5.00E-42
1	8086683	14.16202566	5.70E-42
2	66648398	-14.16164692	5.72E-42
15	31775574	14.1569301	6.06E-42
3	9594069	14.14033023	7.40E-42
16	2042524	14.1239534	9.01E-42
14	80122560	-14.12194555	9.23E-42
14	80122569	-14.12032582	9.41E-42
9	136474686	14.09540609	1.27E-41
19	18344195	14.09061334	1.34E-41
2	42720503	14.07866517	1.55E-41
3	9594078	14.05748669	2.00E-41
14	93389618	14.05530911	2.05E-41
16	2042620	14.05291633	2.11E-41
5	166514641	-14.04165916	2.42E-41
5	166514650	-14.01658694	3.27E-41
1	8086696	14.01576219	3.30E-41
9	136474299	14.0059545	3.71E-41
14	93389760	14.00461302	3.77E-41
13	49795179	14.00071913	3.95E-41
7	130418873	13.99866058	4.05E-41
13	49795090	13.9933215	4.31E-41
19	18343889	13.97503259	5.37E-41
13	49795087	13.96140769	6.31E-41
2	42720506	13.96094028	6.35E-41
13	49795107	13.95687246	6.67E-41
20	38478535	-13.95647382	6.70E-41
2	42720508	13.94327584	7.84E-41
13	49795105	13.93768559	8.38E-41
14	93389762	13.91990592	1.04E-40
11	75141090	13.91246812	1.13E-40
6	105388800	13.90095587	1.30E-40
15	31775958	13.89858341	1.33E-40
2	42720512	13.89705021	1.36E-40
13	49795072	13.89098964	1.46E-40
16	47177676	13.87807956	1.70E-40
13	49795064	13.87570171	1.75E-40
13	49795084	13.85975838	2.12E-40
12	81373826	-13.85736235	2.18E-40
9	136474715	13.85567686	2.22E-40
1	8086667	13.85401735	2.27E-40
2	42720497	13.85293402	2.30E-40
2	66654412	-13.8225351	3.29E-40
5	166478055	-13.79902722	4.35E-40
19	18343880	13.78719594	5.00E-40
5	166478069	-13.77763023	5.60E-40
3	9594093	13.75659517	7.18E-40
16	2042623	13.75334023	7.47E-40
15	31775975	13.74727462	8.02E-40
5	166514632	-13.74138854	8.60E-40
3	9594100	13.73876413	8.87E-40
9	136474295	13.71891119	1.12E-39
14	93389771	13.71833611	1.13E-39
16	2042521	13.71077954	1.23E-39
2	42720488	13.70433126	1.33E-39
15	31775967	13.67816334	1.81E-39
1	53308801	13.67018124	1.99E-39
14	93389611	13.66785498	2.04E-39
1	53308807	13.64722298	2.61E-39
14	100070092	13.63335891	3.07E-39
2	42720485	13.62414328	3.42E-39
9	136474292	13.62333622	3.45E-39
20	38478547	-13.61983956	3.59E-39
2	42720479	13.6168501	3.72E-39
14	93389773	13.61677425	3.72E-39
12	113683854	-13.61374862	3.86E-39
5	16179430	13.61197514	3.94E-39
1	53308809	13.61068328	4.00E-39
9	136474725	13.60675517	4.19E-39
1	8086664	13.59534646	4.79E-39
7	130418877	13.58304534	5.53E-39
14	100070094	13.57437342	6.12E-39
13	49795183	13.52590895	1.08E-38
14	100070070	13.51550814	1.22E-38
10	13569476	-13.51382689	1.24E-38
16	2042519	13.5011445	1.44E-38
2	42720517	13.50034734	1.45E-38
1	53308804	13.49458444	1.55E-38
16	47177681	13.49143507	1.61E-38
1	53308546	13.48467914	1.74E-38
2	42720469	13.48041183	1.83E-38
6	105388795	13.48030936	1.83E-38
15	31775977	13.4617151	2.28E-38
7	130418569	13.45986147	2.33E-38
14	100070080	13.45739689	2.40E-38
13	49795190	13.44173433	2.87E-38
13	49795192	13.42761061	3.39E-38
2	42720452	13.42529676	3.48E-38
8	41753788	13.41394824	3.97E-38
15	31775568	13.41387945	3.97E-38
2	42720391	13.41078445	4.12E-38
2	42720464	13.39198541	5.12E-38
7	156433099	13.38553658	5.52E-38
1	8086748	13.38241879	5.72E-38
2	42720475	13.37788649	6.03E-38
13	49795059	13.36880591	6.70E-38
7	156433101	13.36850181	6.72E-38
6	110736958	-13.35462289	7.89E-38
11	75140951	13.34796842	8.52E-38
11	82254036	-13.34669832	8.65E-38
1	53308636	13.33917498	9.43E-38
2	42720473	13.33648534	9.73E-38
2	42720431	13.33591288	9.79E-38
19	45655921	13.33338987	1.01E-37
7	140753529	-13.32979588	1.05E-37
2	42720401	13.32393915	1.12E-37
2	42720549	13.31951238	1.18E-37
2	42720441	13.31804782	1.20E-37
14	93389597	13.31509039	1.25E-37
14	80122586	-13.30881861	1.34E-37
2	42720448	13.308311	1.35E-37
1	8086662	13.29882349	1.50E-37
8	41753795	13.29262659	1.61E-37
8	41753790	13.28861997	1.69E-37
19	45655916	13.28589405	1.74E-37
8	41753778	13.27784645	1.91E-37
7	130418880	13.27223633	2.04E-37
6	105388869	13.26638943	2.18E-37
6	105388929	13.26613186	2.19E-37
8	41753780	13.26567856	2.20E-37
5	16179436	13.26472936	2.23E-37
11	82254028	-13.26196419	2.30E-37
13	49795057	13.25614807	2.46E-37
2	42720541	13.25506271	2.49E-37
3	68981642	13.25164908	2.59E-37
14	80122523	-13.24230671	2.88E-37
14	100070041	13.24044386	2.94E-37
1	53308680	13.23478641	3.14E-37
16	25063679	-13.23206156	3.24E-37
3	68981631	13.2309268	3.28E-37
1	53308724	13.23015196	3.31E-37
3	68981652	13.22745907	3.42E-37
19	45655924	13.22497911	3.52E-37
14	100070043	13.22040832	3.71E-37
2	42720371	13.21539568	3.92E-37
8	41753775	13.20654806	4.34E-37
3	68981650	13.20436751	4.45E-37
13	49795202	13.19337768	5.05E-37
6	105388923	13.19174357	5.15E-37
1	53308654	13.19118323	5.18E-37
3	68981648	13.18491276	5.57E-37
1	53308683	13.17570082	6.19E-37
3	68981665	13.17496995	6.24E-37
7	156433096	13.17489617	6.24E-37
7	140753533	-13.17356494	6.34E-37
3	68981660	13.17310227	6.37E-37
1	53308780	13.16867635	6.71E-37
1	53308730	13.16519579	6.98E-37
19	45655913	13.16339483	7.12E-37
1	53308673	13.16336895	7.13E-37
3	68981654	13.15675091	7.69E-37
14	93389599	13.15573592	7.78E-37
1	53308710	13.1552385	7.82E-37
19	45655955	13.15191557	8.12E-37
8	41753771	13.15013352	8.29E-37
9	136474730	13.14721722	8.57E-37
1	53308671	13.14690573	8.60E-37
15	31775983	13.13921974	9.39E-37
16	8499225	-13.13820947	9.50E-37
1	53308817	13.13769274	9.56E-37
1	53308705	13.13313944	1.01E-36
6	105388919	13.12871778	1.06E-36
18	19751710	13.12758853	1.07E-36
16	47177690	13.12272747	1.13E-36
18	19751702	13.11875148	1.19E-36
2	42720524	13.1161834	1.22E-36
1	53308543	13.11111716	1.30E-36
2	42720539	13.10962364	1.32E-36
11	75141107	13.10735007	1.35E-36
7	156433108	13.1037142	1.41E-36
1	53308707	13.10191112	1.44E-36
7	156433090	13.09832219	1.50E-36
19	45655927	13.09733362	1.52E-36
7	8482382	13.08701589	1.70E-36
2	42720544	13.08409791	1.76E-36
11	75140947	13.07119066	2.04E-36
22	26535560	-13.06793622	2.12E-36
12	21928608	-13.06708926	2.14E-36
3	9594042	13.06344459	2.23E-36
1	53308795	13.05623522	2.42E-36
11	57671337	-13.05289352	2.51E-36
8	41753800	13.05074781	2.58E-36
6	105388867	13.05053958	2.58E-36
1	53308661	13.05001883	2.60E-36
6	105388903	13.0497882	2.60E-36
6	105388897	13.04525586	2.74E-36
6	105388913	13.04252815	2.83E-36
1	53308584	13.03984003	2.92E-36
2	42720407	13.03702442	3.01E-36
2	123853096	-13.03171071	3.20E-36
14	100070059	13.03155727	3.21E-36
3	68981610	13.02535965	3.44E-36
19	45655942	13.02466154	3.47E-36
6	105388909	13.02047492	3.64E-36
3	68981670	13.01972539	3.67E-36
12	63544013	13.01657273	3.80E-36
11	62269235	-13.01640836	3.81E-36
6	105388905	13.01314602	3.95E-36
12	113683808	-13.0130158	3.96E-36
1	53308688	13.00649795	4.26E-36
14	93389602	13.00162551	4.50E-36
7	8482372	13.00034943	4.57E-36
2	42720384	12.99716736	4.74E-36
1	53308756	12.99666465	4.76E-36
6	105388864	12.99640577	4.78E-36
19	45655895	12.99539638	4.83E-36
16	2042632	12.99098979	5.08E-36
13	25744995	12.98951998	5.17E-36
1	53308701	12.98787763	5.26E-36
19	45655911	12.98153986	5.65E-36
19	45655944	12.98130016	5.67E-36
1	53308768	12.97335925	6.20E-36
2	42720386	12.96169307	7.08E-36
16	2042514	12.95706869	7.46E-36
13	49795055	12.94998871	8.08E-36
6	105388911	12.9465986	8.40E-36
2	42720381	12.94641391	8.42E-36
1	53308589	12.94579426	8.48E-36
7	8482376	12.94251681	8.80E-36
1	53308665	12.94053837	8.99E-36
13	25744988	12.93440842	9.64E-36
15	31775986	12.93189766	9.92E-36
8	41753804	12.92325228	1.09E-35
1	53308760	12.9218327	1.11E-35
6	110736941	-12.91613759	1.18E-35
2	42720409	12.91313983	1.23E-35
11	75141110	12.91140254	1.25E-35
1	53308540	12.90597675	1.33E-35
10	13569445	-12.90450936	1.35E-35
2	42720413	12.90276554	1.38E-35
1	53308575	12.90254231	1.38E-35
13	49795204	12.90086156	1.41E-35
11	75141115	12.8977498	1.46E-35
6	105388947	12.89726715	1.47E-35
2	42720379	12.89184114	1.56E-35
11	82254007	-12.88922013	1.61E-35
2	42720571	12.88663009	1.65E-35
3	51741520	12.88386659	1.71E-35
6	105388883	12.87960565	1.79E-35
19	45655961	12.87825835	1.82E-35
2	42720532	12.87653158	1.85E-35
8	50937521	-12.86592057	2.09E-35
1	53308668	12.86544557	2.10E-35
1	53308823	12.85817781	2.28E-35
19	45655908	12.85720824	2.30E-35
3	9594117	12.85563709	2.34E-35
12	63544127	12.85388804	2.39E-35
8	41753766	12.84398059	2.67E-35
8	41753763	12.84360749	2.68E-35
1	53308758	12.84095411	2.76E-35
9	136474735	12.84046149	2.78E-35
6	105388941	12.84015148	2.79E-35
13	25744990	12.83909895	2.82E-35
12	113683816	-12.82584288	3.28E-35
1	53308535	12.81875275	3.55E-35
19	45655949	12.817099	3.61E-35
16	47177712	12.79746774	4.51E-35
20	38478407	-12.79553064	4.60E-35
14	93389786	12.78798474	5.01E-35
8	24771349	12.78796846	5.01E-35
8	24771352	12.7752464	5.78E-35
12	63544125	12.77080204	6.07E-35
7	140753556	-12.76647116	6.38E-35
7	156433122	12.76396401	6.56E-35
16	47177714	12.7631943	6.62E-35
19	45655879	12.7471147	7.92E-35
1	53308698	12.74493258	8.11E-35
19	45655932	12.73625187	8.94E-35
6	105388954	12.73207287	9.37E-35
16	47177710	12.73022774	9.56E-35
11	82253999	-12.72597703	1.00E-34
12	63544149	12.71462766	1.14E-34
16	2042512	12.71039747	1.19E-34
16	50732454	-12.70001533	1.34E-34
6	105388951	12.69901535	1.36E-34
3	9594131	12.69788844	1.37E-34
7	140753562	-12.69348212	1.44E-34
2	123853083	-12.68701728	1.55E-34
6	105388937	12.6855727	1.57E-34
12	63544015	12.68124763	1.65E-34
7	156433133	12.68015132	1.67E-34
2	42720353	12.6718654	1.83E-34
3	51741473	12.65786754	2.14E-34
5	166478009	-12.65481035	2.22E-34
12	63544123	12.6504961	2.33E-34
16	50732469	-12.64442884	2.49E-34
19	18343868	12.63395166	2.80E-34
11	75141117	12.62494436	3.09E-34
1	8086776	12.6241976	3.12E-34
1	53308609	12.62416483	3.12E-34
22	26535519	-12.62042603	3.25E-34
12	63544171	12.61844824	3.32E-34
7	130418883	12.6136032	3.50E-34
6	105388958	12.61042211	3.63E-34
12	114087153	-12.60627443	3.80E-34
8	24771338	12.603953	3.90E-34
14	93389585	12.59882038	4.13E-34
12	63544097	12.5959953	4.26E-34
13	49795209	12.59524666	4.30E-34
19	45655872	12.59010889	4.55E-34
12	113683786	-12.57893708	5.15E-34
20	38478404	-12.5770889	5.25E-34
12	113683901	-12.57569979	5.34E-34
11	62269226	-12.572189	5.55E-34
6	110736906	-12.57109859	5.61E-34
1	8086778	12.56950422	5.71E-34
20	39632417	-12.56779073	5.82E-34
12	113683778	-12.55863353	6.44E-34
5	16179444	12.54549107	7.45E-34
16	50732271	-12.54526073	7.47E-34
11	62269274	-12.541024	7.83E-34
7	156433080	12.54003534	7.92E-34
12	63544101	12.53962834	7.95E-34
3	68981579	12.53942879	7.97E-34
22	26535601	-12.53897315	8.01E-34
8	24771326	12.53591172	8.29E-34
14	100070017	12.52710012	9.13E-34
16	47177760	12.51960694	9.92E-34
20	44658228	12.51647224	1.03E-33
7	8482360	12.51502431	1.04E-33
12	114087127	-12.51421242	1.05E-33
19	45655876	12.51105007	1.09E-33
12	63544055	12.50283566	1.19E-33
12	63544161	12.49602822	1.29E-33
8	24771317	12.48628131	1.43E-33
19	46002369	12.48548004	1.45E-33
16	25063517	-12.47913393	1.55E-33
6	105388960	12.47758924	1.58E-33
12	63544163	12.47555844	1.61E-33
7	140753574	-12.46407295	1.83E-33
16	47177719	12.46381481	1.83E-33
20	44658230	12.46223271	1.87E-33
13	25744968	12.45764815	1.96E-33
11	9025423	12.45281156	2.07E-33
14	93389790	12.45000032	2.14E-33
12	114087110	-12.44763087	2.19E-33
12	63543976	12.44089818	2.36E-33
9	136474283	12.43611286	2.49E-33
12	63544120	12.43508327	2.52E-33
3	68981679	12.43458368	2.53E-33
9	118765102	-12.43455476	2.53E-33
8	24771371	12.42178749	2.91E-33
16	47177768	12.42173888	2.91E-33
11	62269219	-12.42128318	2.93E-33
16	50732265	-12.41807916	3.03E-33
13	25745023	12.41753656	3.05E-33
2	42720593	12.41704019	3.07E-33
8	24771342	12.41606065	3.10E-33
3	68981682	12.40675836	3.43E-33
13	25745014	12.40367455	3.55E-33
2	42720579	12.40328798	3.57E-33
3	68981684	12.4030519	3.57E-33
13	25745021	12.40290656	3.58E-33
11	9025430	12.39620844	3.85E-33
19	45655870	12.3860772	4.31E-33
11	9025420	12.37157996	5.05E-33
1	62072503	-12.36784995	5.26E-33
7	8482422	12.36643593	5.34E-33
8	41753754	12.36304062	5.54E-33
8	24771390	12.35737481	5.89E-33
14	100070023	12.35192059	6.26E-33
20	44658225	12.34919271	6.44E-33
8	24771367	12.34813897	6.52E-33
20	44658248	12.34409502	6.81E-33
14	100070020	12.33659569	7.40E-33
20	44658234	12.33552767	7.48E-33
11	75141125	12.33218865	7.76E-33
8	24771382	12.33203314	7.77E-33
8	24771360	12.33161368	7.81E-33
9	118765136	-12.33099626	7.86E-33
5	16179448	12.32979399	7.97E-33
13	25745019	12.32978622	7.97E-33
1	53308597	12.32679509	8.23E-33
18	19751684	12.30386077	1.06E-32
9	118765080	-12.2973836	1.13E-32
16	47177772	12.2937956	1.18E-32
19	58095036	12.29293818	1.19E-32
12	63544079	12.2859734	1.28E-32
12	113683920	-12.2838257	1.31E-32
7	8482416	12.27906251	1.38E-32
14	100070013	12.27471974	1.45E-32
19	46002366	12.27434955	1.46E-32
8	41753747	12.26893176	1.55E-32
7	156433071	12.26797918	1.56E-32
16	2042504	12.26624157	1.59E-32
12	63544116	12.26481499	1.62E-32
11	9025412	12.26434784	1.62E-32
1	8086783	12.26214157	1.66E-32
13	25745025	12.26133108	1.68E-32
19	46002352	12.25700161	1.76E-32
10	102321947	12.25527598	1.79E-32
11	9025403	12.25523181	1.79E-32
10	102321953	12.25489609	1.80E-32
16	47177648	12.24826583	1.93E-32
7	140753504	-12.24467452	2.01E-32
2	42720590	12.23855234	2.15E-32
19	46002385	12.23823392	2.16E-32
19	45655970	12.23734839	2.18E-32
12	63544103	12.23450544	2.25E-32
19	46002358	12.22903825	2.38E-32
12	63544040	12.22844574	2.40E-32
7	8482418	12.22668037	2.45E-32
10	102321935	12.22556472	2.48E-32
10	102321942	12.22496814	2.49E-32
10	72015215	12.22350841	2.53E-32
7	120629703	-12.21785131	2.69E-32
12	63544114	12.21735237	2.71E-32
16	8499248	-12.21735014	2.71E-32
22	26535615	-12.21445393	2.79E-32
1	53308832	12.21364596	2.82E-32
14	100070001	12.20831114	2.98E-32
11	9025400	12.20227232	3.19E-32
2	42720586	12.20227004	3.19E-32
16	50732256	-12.20087207	3.23E-32
19	46002354	12.19945667	3.28E-32
8	41753837	12.19497017	3.45E-32
8	41753839	12.18633418	3.79E-32
8	41753743	12.18303751	3.92E-32
7	130418887	12.18249381	3.95E-32
8	24771384	12.18140865	3.99E-32
1	53308520	12.18011406	4.05E-32
7	8482447	12.17824245	4.13E-32
20	39632409	-12.17185825	4.43E-32
19	46002346	12.16964889	4.53E-32
19	58095022	12.1681225	4.61E-32
10	102321929	12.16341804	4.85E-32
12	63544068	12.15774384	5.16E-32
19	46002375	12.15489082	5.32E-32
1	53308517	12.15457745	5.34E-32
9	140024740	12.14867876	5.69E-32
15	31776107	12.14791589	5.73E-32
12	63543968	12.14281912	6.06E-32
19	46002388	12.14259067	6.07E-32
19	58095024	12.13575595	6.54E-32
8	24771398	12.13083196	6.89E-32
10	13569425	-12.13032808	6.93E-32
1	8086786	12.12679625	7.20E-32
2	66648542	-12.12429978	7.40E-32
10	72015204	12.11981632	7.76E-32
16	47177728	12.11946915	7.79E-32
16	50732212	-12.1184287	7.88E-32
10	13569530	-12.1155902	8.12E-32
19	45655852	12.11145398	8.49E-32
3	71478152	-12.10615132	8.99E-32
16	47177776	12.09925498	9.69E-32
11	70650640	-12.09828195	9.79E-32
11	70650655	-12.09742525	9.88E-32
1	62072519	-12.09517117	1.01E-31
6	105388977	12.09388078	1.03E-31
15	31776088	12.08908549	1.08E-31
9	134989631	12.08880525	1.08E-31
19	46002391	12.08793197	1.09E-31
10	102321944	12.08529069	1.13E-31
9	134989638	12.08425799	1.14E-31
14	93389575	12.08236309	1.16E-31
1	210111531	12.08072893	1.18E-31
1	210111540	12.07459451	1.26E-31
20	39632437	-12.07455128	1.26E-31
7	120629706	-12.0694737	1.33E-31
2	42720599	12.06593088	1.39E-31
2	66652149	-12.0638184	1.42E-31
11	70650633	-12.06279038	1.43E-31
7	140753486	-12.06129372	1.46E-31
11	70650648	-12.0597797	1.48E-31
15	31776080	12.04627467	1.71E-31
18	19751682	12.04187472	1.79E-31
12	114087101	-12.0366881	1.90E-31
1	53308514	12.03519781	1.93E-31
14	100069991	12.03490304	1.93E-31
3	9594146	12.03481988	1.93E-31
3	9594144	12.03363387	1.96E-31
11	75140940	12.03306744	1.97E-31
21	22535157	-12.02733968	2.10E-31
4	186576440	-12.02506187	2.15E-31
12	63544065	12.02188603	2.22E-31
15	31776103	12.02182649	2.22E-31
16	8499252	-12.02144674	2.23E-31
6	105388966	12.01693295	2.34E-31
3	71478170	-12.01616023	2.36E-31
20	44658264	12.01478044	2.40E-31
7	156433147	12.01470566	2.40E-31
1	148244719	-12.01358706	2.43E-31
9	140024735	12.01303844	2.44E-31
19	18343858	12.01253651	2.46E-31
4	186576472	-12.01073816	2.50E-31
12	63544175	12.01038886	2.51E-31
4	186576417	-12.00547348	2.65E-31
16	47177731	12.0044413	2.68E-31
10	72015206	11.99966069	2.82E-31
7	156433068	11.99861748	2.85E-31
19	46002331	11.99788816	2.87E-31
15	31776090	11.99586832	2.94E-31
15	31776096	11.98974051	3.13E-31
10	72015218	11.98527839	3.29E-31
16	10174995	-11.98218327	3.40E-31
1	210111542	11.98141097	3.43E-31
19	46002340	11.98050189	3.46E-31
19	33167501	11.98028076	3.47E-31
7	156433141	11.97756816	3.57E-31
2	123853133	-11.97626669	3.62E-31
13	49795232	11.97556863	3.65E-31
9	139093707	11.97502697	3.67E-31
1	8086643	11.97283621	3.75E-31
10	72015208	11.97231741	3.77E-31
16	47177738	11.96223718	4.20E-31
16	47177752	11.96122274	4.25E-31
19	45655858	11.9591015	4.35E-31
1	210111561	11.95775242	4.41E-31
11	75141128	11.9515772	4.71E-31
9	99374499	-11.94995222	4.79E-31
1	8086640	11.94576965	5.01E-31
20	44658253	11.94384027	5.11E-31
10	102322000	11.94313039	5.15E-31
16	47177755	11.94287085	5.17E-31
7	120629709	-11.94252296	5.19E-31
12	63543831	11.93979115	5.34E-31
2	42720612	11.93834329	5.42E-31
9	139093720	11.93559327	5.58E-31
2	42720632	11.93529413	5.60E-31
2	42720623	11.93320565	5.73E-31
4	48485464	11.93087914	5.87E-31
4	48485470	11.92508229	6.24E-31
4	48485462	11.92477002	6.27E-31
5	86214296	-11.92336448	6.36E-31
16	47177750	11.91980503	6.61E-31
9	140024772	11.91867274	6.69E-31
3	68981698	11.91342473	7.07E-31
19	46002396	11.90787935	7.50E-31
11	9025437	11.90544965	7.70E-31
8	24771412	11.90495513	7.74E-31
12	63543856	11.90312152	7.89E-31
3	68981568	11.9021158	7.97E-31
16	47177783	11.90176045	8.00E-31
19	46002394	11.90159551	8.02E-31
21	22535168	-11.89832072	8.30E-31
2	42720628	11.89662691	8.45E-31
3	9594159	11.89560205	8.54E-31
8	91343011	-11.89414338	8.68E-31
9	140024737	11.88882541	9.18E-31
10	72015220	11.88849034	9.21E-31
9	140024753	11.88733304	9.33E-31
1	53308844	11.88722074	9.34E-31
19	58095011	11.88178023	9.89E-31
10	102321991	11.87821406	1.03E-30
9	139093715	11.87488743	1.06E-30
3	127347855	11.87476984	1.07E-30
3	71478087	-11.8736051	1.08E-30
14	80053724	-11.87357267	1.08E-30
3	51990115	11.86361789	1.20E-30
9	139093725	11.86285577	1.21E-30
1	210111549	11.86279631	1.21E-30
20	44658273	11.85603818	1.30E-30
16	47177735	11.85499643	1.31E-30
10	72015229	11.85492312	1.32E-30
9	140024767	11.85175292	1.36E-30
19	58095004	11.85137905	1.37E-30
4	48485477	11.85002788	1.39E-30
15	31776076	11.84837073	1.41E-30
7	32467546	11.84593457	1.45E-30
9	136474747	11.8439563	1.48E-30
9	140024721	11.84330317	1.49E-30
12	11653465	11.84314372	1.49E-30
2	42720326	11.84307063	1.49E-30
16	47177792	11.84305774	1.49E-30
2	66652192	-11.84152612	1.52E-30
14	100069987	11.84077515	1.53E-30
19	33167494	11.83932632	1.55E-30
9	140024763	11.83506097	1.62E-30
12	63543874	11.83246438	1.67E-30
1	210111559	11.83224744	1.67E-30
14	100069989	11.82794991	1.75E-30
11	9025452	11.82284052	1.85E-30
3	9594022	11.81432809	2.02E-30
10	102321961	11.81300943	2.05E-30
12	63543878	11.81209783	2.07E-30
13	49795039	11.81087694	2.10E-30
1	53308841	11.80998357	2.12E-30
7	32467535	11.80933165	2.13E-30
1	8086793	11.80600482	2.21E-30
5	92906496	11.80367305	2.26E-30
15	31775996	11.79842402	2.39E-30
2	42720324	11.79385851	2.51E-30
7	156433056	11.79285923	2.54E-30
9	134989653	11.79153846	2.57E-30
12	63543858	11.79039776	2.60E-30
1	207996961	-11.7886164	2.65E-30
8	41753843	11.78553257	2.74E-30
19	33167509	11.78145492	2.86E-30
5	166478116	-11.78108347	2.87E-30
7	32467543	11.77819789	2.96E-30
1	210111574	11.77817981	2.96E-30
1	62072522	-11.77767266	2.98E-30
12	11653490	11.77641356	3.02E-30
7	32467569	11.77631307	3.02E-30
7	32467522	11.77400859	3.09E-30
8	91342980	-11.7725204	3.14E-30
6	107956010	11.76970725	3.24E-30
3	51741553	11.76920767	3.25E-30
9	140024756	11.76915709	3.26E-30
19	33167535	11.76617976	3.36E-30
14	80053705	-11.76559053	3.38E-30
15	31776133	11.76344774	3.46E-30
1	148244725	-11.76253705	3.49E-30
19	39997744	11.76219805	3.50E-30
2	66652198	-11.76090269	3.55E-30
16	47177796	11.75975967	3.59E-30
19	46002295	11.75922335	3.61E-30
19	33167526	11.75706858	3.70E-30
7	120629721	-11.75630527	3.73E-30
2	42720618	11.75558813	3.76E-30
19	46002303	11.75304651	3.86E-30
7	120629685	-11.75177925	3.91E-30
3	9594151	11.74793872	4.07E-30
3	68981704	11.7475774	4.09E-30
12	63543872	11.74665071	4.13E-30
16	47177629	11.745392	4.18E-30
12	113683934	-11.74509153	4.19E-30
1	207996936	-11.74033002	4.41E-30
6	107956019	11.73945619	4.45E-30
1	53308846	11.73936408	4.45E-30
19	15343049	11.73729657	4.55E-30
7	32467548	11.73637719	4.60E-30
19	33167492	11.73485187	4.67E-30
1	210111525	11.73400091	4.71E-30
15	31776073	11.72992084	4.92E-30
19	46002284	11.72893182	4.97E-30
10	72015227	11.72833152	5.00E-30
11	124791109	11.72774471	5.03E-30
6	107956004	11.72751277	5.05E-30
19	45655846	11.72716623	5.06E-30
16	10175013	-11.72699606	5.07E-30
7	8482336	11.72550701	5.15E-30
7	32467595	11.72499259	5.18E-30
11	9025448	11.72319675	5.28E-30
9	136474274	11.72111451	5.40E-30
10	72015235	11.70880421	6.14E-30
13	25745035	11.70861907	6.15E-30
4	48485459	11.70781465	6.20E-30
19	46002306	11.70700632	6.26E-30
10	100121453	-11.70469902	6.41E-30
2	38301894	11.68885255	7.57E-30
19	39997728	11.68564108	7.83E-30
20	44658279	11.68251222	8.09E-30
12	63543954	11.68033791	8.28E-30
19	39997749	11.67788817	8.49E-30
8	24771416	11.67540443	8.71E-30
19	33167543	11.6743861	8.81E-30
1	91183241	11.67374429	8.87E-30
15	31775406	11.66882883	9.34E-30
1	8086802	11.66828226	9.39E-30
10	102321900	11.66701833	9.51E-30
9	140024750	11.66665285	9.55E-30
7	8482338	11.66636068	9.58E-30
9	139093697	11.66013446	1.02E-29
7	32467592	11.66002416	1.02E-29
19	46002399	11.65892193	1.04E-29
3	136882333	-11.65890981	1.04E-29
1	210111480	11.65413542	1.09E-29
19	33167538	11.65408274	1.09E-29
14	100070131	11.65371164	1.09E-29
19	39997736	11.65357192	1.10E-29
19	46002270	11.65285937	1.10E-29
10	102321907	11.65281634	1.10E-29
10	100121436	-11.65246792	1.11E-29
5	16179033	11.65237051	1.11E-29
6	11044800	11.6482776	1.16E-29
19	33167487	11.64807057	1.16E-29
2	42720653	11.64769838	1.16E-29
19	39997734	11.64678519	1.18E-29
2	110372276	11.64421396	1.21E-29
11	9025387	11.64391614	1.21E-29
12	63543908	11.64278747	1.23E-29
19	15343046	11.63839043	1.28E-29
2	110372294	11.63756228	1.29E-29
1	53308509	11.63245029	1.37E-29
6	11044806	11.6322029	1.37E-29
9	139093701	11.62910066	1.41E-29
2	66648553	-11.62797776	1.43E-29
6	107956001	11.62740707	1.44E-29
11	124791121	11.62689186	1.45E-29
16	47177800	11.62422538	1.49E-29
17	30651431	-11.62273551	1.51E-29
10	107618067	-11.62244642	1.52E-29
11	70650629	-11.62022907	1.55E-29
12	11653486	11.61637449	1.62E-29
16	10174962	-11.61290971	1.67E-29
10	102322019	11.60970761	1.73E-29
2	110372279	11.60675898	1.79E-29
1	210111600	11.6060275	1.80E-29
19	33167489	11.60253161	1.87E-29
11	124791107	11.60048073	1.91E-29
16	8499267	-11.5999889	1.92E-29
8	101156030	-11.59485308	2.02E-29
15	31776071	11.59400737	2.04E-29
9	134989622	11.58869007	2.16E-29
19	33167497	11.58787626	2.17E-29
14	100070121	11.5872103	2.19E-29
3	127347864	11.5862686	2.21E-29
2	110372285	11.58605395	2.22E-29
1	53308868	11.58376342	2.27E-29
19	39997755	11.58165223	2.32E-29
10	102321982	11.57885771	2.39E-29
2	42720317	11.57320708	2.53E-29
19	46002297	11.57275208	2.54E-29
17	77814351	11.57110499	2.59E-29
8	27405780	-11.56860552	2.66E-29
19	33167548	11.56644105	2.72E-29
1	53308851	11.56598054	2.73E-29
11	60718798	11.56558496	2.74E-29
14	100070124	11.56542814	2.75E-29
1	210111473	11.56535449	2.75E-29
19	33167550	11.56304286	2.81E-29
1	210111494	11.56299061	2.82E-29
16	47177803	11.56275192	2.82E-29
3	51990102	11.56199879	2.84E-29
8	24771422	11.56140073	2.86E-29
9	140033906	11.56087461	2.88E-29
19	47951240	11.5589629	2.94E-29
19	18343852	11.55820435	2.96E-29
14	100070134	11.55759091	2.98E-29
22	46440123	-11.5555735	3.04E-29
15	79576149	11.55506028	3.06E-29
12	11653510	11.55464917	3.07E-29
19	39997764	11.55058698	3.20E-29
19	45655840	11.54878485	3.26E-29
13	25744947	11.54859433	3.27E-29
16	47177798	11.54629463	3.35E-29
1	210111468	11.54609006	3.36E-29
10	107618047	-11.54469714	3.40E-29
15	31776064	11.54455692	3.41E-29
19	33167552	11.54436053	3.42E-29
11	124791129	11.54405662	3.43E-29
1	210111470	11.5436051	3.44E-29
1	91183237	11.5415936	3.52E-29
6	105388986	11.53890184	3.62E-29
12	63543861	11.53629807	3.72E-29
1	210111464	11.52987693	3.97E-29
3	71478078	-11.52954406	3.98E-29
11	124791114	11.52591934	4.14E-29
13	36295501	-11.52158575	4.33E-29
12	63543864	11.52083947	4.36E-29
2	110372282	11.51821117	4.48E-29
5	92906488	11.51201723	4.78E-29
3	51741444	11.50884233	4.94E-29
12	63544206	11.50823987	4.97E-29
5	92906480	11.50794214	4.98E-29
12	11653499	11.50478212	5.15E-29
1	20117243	-11.50354427	5.22E-29
15	31775395	11.50111575	5.35E-29
4	48485447	11.49644262	5.61E-29
9	140024781	11.49585579	5.65E-29
8	27405785	-11.49333412	5.80E-29
1	210111504	11.49225532	5.86E-29
1	53308502	11.49074381	5.96E-29
6	107955994	11.49019398	5.99E-29
7	8482325	11.48946493	6.03E-29
11	60718796	11.48926501	6.05E-29
5	92906499	11.48768934	6.15E-29
2	123853141	-11.48723333	6.18E-29
12	63544217	11.48715124	6.18E-29
19	45656015	11.48659401	6.22E-29
13	67806792	-11.48657562	6.22E-29
3	51990082	11.48589992	6.26E-29
1	91183254	11.48506323	6.32E-29
4	48485453	11.48340155	6.43E-29
15	31776067	11.48303649	6.45E-29
6	11044796	11.48119927	6.57E-29
1	20117235	-11.48022973	6.64E-29
9	140033898	11.47902587	6.72E-29
1	210111604	11.47493366	7.01E-29
10	102321968	11.47466826	7.03E-29
11	124791125	11.4718919	7.24E-29
6	107956073	11.46973318	7.40E-29
19	58095069	11.46607562	7.68E-29
5	92906473	11.46218768	8.00E-29
14	65009184	11.4581922	8.34E-29
15	31775377	11.45606845	8.52E-29
19	39997725	11.45475964	8.64E-29
7	8482467	11.45297671	8.80E-29
9	99374444	-11.45046553	9.03E-29
5	16179640	11.45029824	9.04E-29
11	69477096	-11.44458274	9.59E-29
10	102321894	11.44306013	9.74E-29
13	36295497	-11.44287603	9.76E-29
2	42720649	11.44260574	9.79E-29
3	51990120	11.44161517	9.89E-29
3	51990123	11.44069734	9.99E-29
22	46440137	-11.43897127	1.02E-28
19	47951265	11.43719756	1.04E-28
3	127347847	11.43670358	1.04E-28
1	210111482	11.43640175	1.04E-28
14	65009186	11.43518613	1.06E-28
8	27405744	-11.43393495	1.07E-28
19	33167546	11.43185645	1.09E-28
9	140024784	11.43145412	1.10E-28
12	84902593	-11.42731038	1.15E-28
1	53308872	11.4241173	1.18E-28
19	15343055	11.42140781	1.22E-28
18	44781079	11.41989975	1.24E-28
1	91183243	11.4185886	1.25E-28
16	47177805	11.41790051	1.26E-28
19	36454634	11.41492113	1.30E-28
9	140033904	11.41379087	1.32E-28
19	58095064	11.41193161	1.34E-28
18	44781071	11.41075381	1.36E-28
9	139093688	11.40801958	1.40E-28
4	48485484	11.40596355	1.43E-28
9	140033900	11.40399933	1.46E-28
3	51990100	11.4039387	1.46E-28
2	145278509	-11.40210921	1.49E-28
8	24771289	11.40171567	1.49E-28
10	107618082	-11.40136248	1.50E-28
9	139093730	11.39901449	1.53E-28
14	65008600	11.39882413	1.54E-28
18	19751728	11.39865954	1.54E-28
1	20117265	-11.39696247	1.57E-28
14	93389572	11.39686782	1.57E-28
20	49308851	-11.3965721	1.57E-28
11	124791119	11.39236676	1.64E-28
11	124791098	11.39148942	1.66E-28
5	92906476	11.39071738	1.67E-28
19	45655982	11.38880104	1.70E-28
1	53308875	11.38651777	1.74E-28
14	100070136	11.38508678	1.77E-28
19	58095079	11.38276565	1.81E-28
8	101156022	-11.38242974	1.82E-28
19	47951271	11.3820779	1.83E-28
7	20824394	11.38123225	1.84E-28
3	68981717	11.3810911	1.84E-28
15	31775398	11.37906413	1.88E-28
1	210111498	11.37729817	1.92E-28
3	51990084	11.37712427	1.92E-28
6	107956081	11.37670157	1.93E-28
1	53308880	11.3763804	1.94E-28
15	79576138	11.37286502	2.01E-28
8	41753725	11.37250841	2.01E-28
11	75141139	11.37183136	2.03E-28
2	42720868	11.37020525	2.06E-28
8	41753732	11.36977055	2.07E-28
12	63544203	11.36751195	2.12E-28
7	156433159	11.36188313	2.25E-28
8	24771437	11.36093876	2.27E-28
2	42720669	11.3609075	2.27E-28
7	20824396	11.36002991	2.29E-28
4	48485487	11.35872352	2.32E-28
10	102321889	11.35784602	2.34E-28
7	20824400	11.35572313	2.39E-28
16	2042489	11.34762405	2.60E-28
1	155959036	-11.34732515	2.61E-28
14	100069977	11.34551937	2.66E-28
11	69477130	-11.34543706	2.66E-28
19	45655984	11.34334288	2.72E-28
22	46440092	-11.34274569	2.73E-28
14	100069972	11.34254946	2.74E-28
2	42720891	11.34176512	2.76E-28
17	77814354	11.33809397	2.86E-28
18	44781076	11.33631597	2.92E-28
7	121969515	11.33585865	2.93E-28
19	15343043	11.33512709	2.95E-28
1	210111516	11.33461883	2.97E-28
17	30651408	-11.33200178	3.05E-28
2	123853031	-11.32877552	3.15E-28
8	24771430	11.32865678	3.16E-28
11	60718808	11.32784755	3.18E-28
20	44658203	11.32609511	3.24E-28
6	105388989	11.32562762	3.25E-28
5	92906463	11.32468244	3.29E-28
1	210111590	11.32313564	3.34E-28
6	11044772	11.3230552	3.34E-28
14	93389568	11.32251352	3.36E-28
3	136882372	-11.32205857	3.38E-28
12	63543950	11.32199728	3.38E-28
1	210111509	11.32044048	3.43E-28
19	33167474	11.31819883	3.51E-28
19	45655999	11.31814693	3.51E-28
6	11044780	11.31685479	3.56E-28
3	51990175	11.31458955	3.64E-28
1	91183260	11.31436046	3.65E-28
9	140772403	11.31427839	3.66E-28
15	62456303	11.3109548	3.78E-28
2	42720860	11.31030728	3.81E-28
19	33167480	11.31012103	3.81E-28
11	59943455	-11.31007486	3.82E-28
19	46002282	11.30937648	3.84E-28
6	11044823	11.30625639	3.97E-28
6	11044818	11.30403803	4.06E-28
6	110736865	-11.30301803	4.10E-28
9	140024787	11.30296103	4.10E-28
5	175223791	11.30225859	4.13E-28
8	101156038	-11.30122968	4.18E-28
7	32467513	11.30113506	4.18E-28
2	42720794	11.29991513	4.23E-28
13	49795022	11.29890804	4.28E-28
7	130418549	11.29793929	4.32E-28
4	48485441	11.29612958	4.40E-28
6	11044820	11.29532884	4.44E-28
7	156433161	11.29492047	4.45E-28
16	47177626	11.29442476	4.48E-28
11	60718805	11.29374043	4.51E-28
5	92906507	11.29307965	4.54E-28
12	63544208	11.2921495	4.58E-28
6	107956069	11.29185045	4.60E-28
2	42720885	11.29023149	4.67E-28
2	145278485	-11.28944127	4.71E-28
12	63544256	11.28841667	4.76E-28
12	114087081	-11.2878671	4.79E-28
19	46002263	11.28761396	4.80E-28
1	91183258	11.28246524	5.06E-28
11	60718803	11.27910148	5.23E-28
10	120355712	11.2774577	5.32E-28
3	9594001	11.27741242	5.33E-28
1	53308493	11.27700919	5.35E-28
11	60718801	11.27399331	5.51E-28
19	46002280	11.27364618	5.53E-28
11	124791091	11.27286127	5.58E-28
14	93389812	11.27105616	5.68E-28
4	48485444	11.27093398	5.69E-28
7	32467603	11.26778348	5.87E-28
11	124791133	11.2677249	5.88E-28
2	42720664	11.2672888	5.90E-28
12	11653513	11.26598035	5.98E-28
22	46440074	-11.26366734	6.13E-28
2	42720882	11.26315543	6.16E-28
8	24771432	11.26263569	6.19E-28
14	100069961	11.262471	6.20E-28
7	20824408	11.26028971	6.34E-28
7	156433048	11.25942705	6.40E-28
5	16179645	11.25882784	6.44E-28
18	44781064	11.25808861	6.48E-28
2	42720879	11.25606695	6.62E-28
5	92906478	11.25461933	6.72E-28
7	8482473	11.2521603	6.89E-28
2	42720904	11.25057188	7.00E-28
2	38301901	11.24941769	7.08E-28
19	39997770	11.24935164	7.09E-28
6	11044814	11.24923702	7.10E-28
1	53308906	11.24879534	7.13E-28
6	107956086	11.24759537	7.21E-28
4	48485496	11.24746069	7.22E-28
1	53308882	11.24446053	7.45E-28
7	8482538	11.24404446	7.48E-28
20	49308879	-11.24355499	7.52E-28
19	33167472	11.24329355	7.54E-28
5	16179461	11.24264155	7.59E-28
7	20824385	11.24222044	7.62E-28
15	79576129	11.23865776	7.90E-28
1	91183262	11.2385764	7.91E-28
6	11044833	11.2384179	7.92E-28
6	107956046	11.23484131	8.21E-28
6	145562621	-11.23375205	8.31E-28
2	42720851	11.2328385	8.38E-28
6	107956067	11.23263521	8.40E-28
11	124791087	11.2310053	8.54E-28
13	49795010	11.22991731	8.64E-28
9	140772371	11.22822525	8.79E-28
11	60718780	11.22697803	8.90E-28
7	8482540	11.22651349	8.94E-28
1	62072478	-11.22557822	9.02E-28
19	45655996	11.22525275	9.05E-28
6	11044778	11.2218342	9.37E-28
1	53308495	11.21909585	9.64E-28
19	39997723	11.21869924	9.68E-28
10	72015246	11.21612596	9.93E-28
9	140033909	11.21542527	1.00E-27
4	48485503	11.21361098	1.02E-27
6	107956029	11.21311507	1.02E-27
9	140772397	11.21183015	1.04E-27
6	100913166	11.21043566	1.05E-27
19	36454623	11.21036685	1.05E-27
3	51990149	11.20962173	1.06E-27
14	100069968	11.20867543	1.07E-27
15	31775543	11.20728987	1.09E-27
2	42720844	11.20435138	1.12E-27
17	77814329	11.20364243	1.13E-27
20	44658199	11.20158602	1.15E-27
5	16179693	11.20136922	1.15E-27
1	53308893	11.20084615	1.16E-27
1	20117229	-11.20021257	1.17E-27
14	100069963	11.19942172	1.18E-27
1	91183219	11.19671241	1.21E-27
19	45655827	11.19598605	1.22E-27
19	36454620	11.19528262	1.23E-27
6	11044812	11.1945174	1.24E-27
3	68981719	11.19062063	1.29E-27
19	58095075	11.18909588	1.31E-27
14	100069954	11.18857574	1.31E-27
4	48485506	11.18755723	1.33E-27
3	9594168	11.18753242	1.33E-27
19	47951229	11.18407322	1.37E-27
6	11044782	11.18350938	1.38E-27
2	42720928	11.18348431	1.38E-27
14	93389564	11.18193404	1.40E-27
17	30651486	-11.1811619	1.42E-27
14	65009196	11.18094886	1.42E-27
1	210111486	11.17961746	1.44E-27
19	58094994	11.17898418	1.45E-27
14	65008998	11.17622779	1.49E-27
14	65009168	11.17544022	1.50E-27
4	48485499	11.17517102	1.50E-27
13	25744941	11.17448733	1.51E-27
2	42720926	11.17247928	1.55E-27
9	139093676	11.17114191	1.57E-27
6	100913149	11.17097591	1.57E-27
16	47177811	11.16975409	1.59E-27
3	51990156	11.16967471	1.59E-27
20	21377867	11.16881274	1.60E-27
2	42720848	11.16846109	1.61E-27
7	8482470	11.16627926	1.65E-27
9	140033911	11.16193259	1.72E-27
7	8482560	11.16178728	1.72E-27
8	106334394	-11.16176902	1.72E-27
7	20824423	11.16031134	1.75E-27
5	16179647	11.15900658	1.77E-27
13	67806748	-11.15827079	1.79E-27
15	79576133	11.1578193	1.79E-27
1	91183250	11.15758804	1.80E-27
13	49795007	11.15673065	1.81E-27
1	53308908	11.15649717	1.82E-27
18	19751669	11.15496737	1.85E-27
2	242498313	11.15458417	1.85E-27
12	63543932	11.15338894	1.88E-27
9	140772369	11.15075713	1.93E-27
12	63544241	11.15055574	1.93E-27
16	50732508	-11.14757634	1.99E-27
3	51990087	11.14617054	2.02E-27
2	110372270	11.14615141	2.02E-27
7	8482558	11.14499013	2.04E-27
4	129308330	-11.14396099	2.06E-27
14	93389557	11.143524	2.07E-27
6	100913152	11.14300018	2.08E-27
7	8482572	11.1406135	2.13E-27
6	107956035	11.14056861	2.13E-27
14	65009141	11.13838967	2.18E-27
1	53308482	11.13770921	2.20E-27
6	11044837	11.13745312	2.20E-27
9	140772359	11.13545575	2.25E-27
9	140772378	11.12969926	2.38E-27
7	20824411	11.12697011	2.45E-27
8	41753857	11.12696454	2.45E-27
6	107956060	11.12640454	2.46E-27
6	145562603	-11.12410493	2.52E-27
19	45656022	11.1233451	2.54E-27
1	91183225	11.12316347	2.54E-27
3	127347868	11.12228493	2.57E-27
16	47177617	11.12084315	2.60E-27
15	58357446	11.12037628	2.62E-27
15	31776061	11.11938943	2.64E-27
7	130418902	11.11921467	2.65E-27
15	31776057	11.11920623	2.65E-27
9	139093735	11.11598732	2.74E-27
7	8482525	11.11517901	2.76E-27
5	86214266	-11.11511198	2.76E-27
14	65009010	11.11298525	2.82E-27
10	120355747	11.11254649	2.83E-27
3	51990073	11.11057654	2.89E-27
19	36454616	11.10445771	3.07E-27
19	19245578	11.10433101	3.08E-27
11	64480747	11.10276862	3.13E-27
2	42720786	11.10263851	3.13E-27
5	175223798	11.10244215	3.14E-27
10	72015178	11.10200907	3.15E-27
19	15343017	11.0992202	3.24E-27
6	107956056	11.09804397	3.28E-27
2	42720931	11.09747855	3.30E-27
1	148244698	-11.09713757	3.31E-27
5	16179696	11.09681029	3.32E-27
9	139093743	11.0964255	3.33E-27
19	39997772	11.09626184	3.34E-27
3	51990070	11.09410373	3.41E-27
19	45655990	11.09377754	3.42E-27
8	11566325	11.09351649	3.43E-27
14	60982400	11.09277746	3.46E-27
11	64480745	11.09235206	3.47E-27
19	19245575	11.09057345	3.53E-27
19	45656006	11.09042743	3.54E-27
2	242498315	11.09003232	3.55E-27
2	42720301	11.08841186	3.61E-27
4	129308389	-11.08760899	3.64E-27
1	91183223	11.08750503	3.64E-27
21	22535186	-11.08748367	3.65E-27
12	63543936	11.08670682	3.67E-27
19	45655824	11.08622621	3.69E-27
1	91183268	11.084683	3.75E-27
3	51990132	11.08389589	3.78E-27
12	63544243	11.08368476	3.79E-27
7	8482568	11.08360048	3.79E-27
6	107956058	11.08338555	3.80E-27
14	65009019	11.08317674	3.81E-27
7	20824478	11.08221849	3.84E-27
6	107956088	11.0802391	3.92E-27
1	21671680	11.07921079	3.96E-27
7	8482322	11.07827388	4.00E-27
19	47951274	11.0775613	4.03E-27
13	49795031	11.07744218	4.03E-27
2	38301910	11.07666911	4.06E-27
4	48485438	11.07608961	4.09E-27
2	38302228	11.07575886	4.10E-27
2	42720678	11.07482399	4.14E-27
6	11044844	11.07092292	4.31E-27
11	64480750	11.06989792	4.35E-27
11	64480766	11.06864224	4.41E-27
15	62456299	11.06697388	4.48E-27
9	25689465	-11.06490597	4.57E-27
6	11044841	11.06239353	4.69E-27
2	42720934	11.06192053	4.71E-27
20	21377888	11.06049725	4.78E-27
3	127347876	11.05963858	4.82E-27
5	16179463	11.05830111	4.89E-27
15	31776145	11.05814107	4.90E-27
14	100069957	11.05802285	4.90E-27
1	207996674	-11.05282956	5.16E-27
1	210111459	11.05210777	5.20E-27
8	106334382	-11.05186867	5.21E-27
19	19245616	11.04940928	5.34E-27
10	72015252	11.04882605	5.37E-27
18	19751662	11.04856266	5.39E-27
14	80053770	-11.04435631	5.62E-27
19	58095090	11.04278177	5.71E-27
19	33167563	11.04232352	5.74E-27
10	102321884	11.04132613	5.79E-27
18	19751629	11.04040995	5.85E-27
18	44781089	11.04030377	5.85E-27
11	75141146	11.04027435	5.86E-27
2	38302230	11.04012789	5.86E-27
6	100913147	11.03879583	5.94E-27
19	19245559	11.03873231	5.95E-27
14	60982404	11.03798733	5.99E-27
18	19751650	11.037434	6.03E-27
14	23450939	11.03689477	6.06E-27
17	77814357	11.03657634	6.08E-27
14	100069951	11.03627618	6.10E-27
20	21377822	11.03530415	6.16E-27
13	49794983	11.03440494	6.21E-27
5	175223800	11.03340583	6.27E-27
14	65009175	11.03274012	6.32E-27
7	20824476	11.03230317	6.34E-27
20	21377861	11.02968172	6.51E-27
1	207996982	-11.02900016	6.56E-27
5	16179633	11.02737609	6.66E-27
11	69477141	-11.02721065	6.68E-27
1	207996634	-11.02390146	6.90E-27
6	100913135	11.02160946	7.06E-27
19	19245618	11.02050109	7.14E-27
4	48485515	11.01983124	7.19E-27
9	140772392	11.01728993	7.37E-27
2	212943071	-11.01646237	7.43E-27
2	242498307	11.01582954	7.48E-27
8	24771447	11.01268451	7.72E-27
19	33167452	11.01194192	7.78E-27
6	11044861	11.01150288	7.81E-27
5	16179653	11.01078416	7.87E-27
15	62456296	11.00871908	8.03E-27
14	23450933	11.00823767	8.07E-27
9	140024791	11.00685267	8.18E-27
18	19751632	11.00675381	8.19E-27
7	8482486	11.00663398	8.20E-27
11	59943477	-11.00487841	8.35E-27
1	91183216	11.004784	8.36E-27
3	51990061	11.00386929	8.43E-27
19	36454614	11.00319606	8.49E-27
19	15343028	11.00200416	8.59E-27
3	51990127	11.00145346	8.64E-27
10	122040321	-11.00104903	8.67E-27
19	47951223	10.99922624	8.83E-27
19	39997717	10.9991051	8.84E-27
19	45656024	10.99902188	8.85E-27
3	51990048	10.99857696	8.89E-27
7	8482503	10.99493981	9.22E-27
13	25744934	10.9949194	9.22E-27
9	140033889	10.99414398	9.29E-27
9	136474269	10.9933838	9.36E-27
2	38301883	10.99274801	9.42E-27
15	79576126	10.99208873	9.49E-27
1	21671677	10.99090524	9.60E-27
19	33167469	10.98801751	9.88E-27
19	15343025	10.98524045	1.02E-26
19	47951208	10.98358609	1.03E-26
15	62456310	10.9792072	1.08E-26
19	19245614	10.97901179	1.08E-26
17	77814362	10.97888185	1.08E-26
1	21671656	10.97840367	1.09E-26
5	16179699	10.97764142	1.10E-26
14	65009146	10.97658005	1.11E-26
1	21671659	10.97592072	1.11E-26
9	25689459	-10.97402764	1.14E-26
8	11566259	10.97367224	1.14E-26
18	19751627	10.97076042	1.17E-26
19	18343842	10.96963535	1.19E-26
18	19751647	10.96823767	1.20E-26
22	44258452	10.9662264	1.23E-26
5	16179663	10.9643363	1.25E-26
12	84902633	-10.96418013	1.25E-26
9	140772331	10.96399628	1.26E-26
9	140024689	10.96336775	1.26E-26
12	63543800	10.96269111	1.27E-26
19	46002414	10.96175423	1.28E-26
19	19245561	10.96123559	1.29E-26
10	120355750	10.96103786	1.29E-26
2	42720916	10.96012808	1.30E-26
4	8582489	10.95899882	1.32E-26
9	140772333	10.95875742	1.32E-26
10	107618028	-10.95839998	1.33E-26
14	100070146	10.9583362	1.33E-26
2	42720941	10.95816728	1.33E-26
2	110372267	10.95741887	1.34E-26
4	139619769	-10.95677329	1.35E-26
1	148244696	-10.95609014	1.36E-26
2	212943109	-10.95489443	1.37E-26
14	65008983	10.95355691	1.39E-26
22	39941959	10.95318125	1.40E-26
2	42720914	10.9530703	1.40E-26
4	48485521	10.95195073	1.42E-26
4	48485519	10.95164507	1.42E-26
15	31775435	10.95121732	1.43E-26
7	130706749	-10.95105241	1.43E-26
14	65009156	10.95028733	1.44E-26
8	11566309	10.94962315	1.45E-26
6	11044864	10.94956701	1.45E-26
6	107956093	10.94844	1.47E-26
2	42720290	10.94750358	1.48E-26
17	77814367	10.94732923	1.48E-26
5	92906456	10.94695817	1.49E-26
20	49308885	-10.94636934	1.50E-26
1	21671689	10.94597659	1.50E-26
19	15343035	10.94581079	1.51E-26
5	16179660	10.94533158	1.51E-26
3	9593995	10.94249476	1.56E-26
15	31776052	10.94228255	1.56E-26
8	11566285	10.94167227	1.57E-26
14	65009179	10.94134603	1.57E-26
14	65009173	10.94077234	1.58E-26
10	120355743	10.93849355	1.62E-26
7	20824425	10.93828136	1.62E-26
13	25744938	10.93737761	1.64E-26
2	38302234	10.93651046	1.65E-26
4	48485512	10.93647518	1.65E-26
16	47177603	10.93519271	1.67E-26
8	11566268	10.93472665	1.68E-26
16	47177600	10.93469963	1.68E-26
8	11566277	10.93386678	1.70E-26
9	140772345	10.93347127	1.70E-26
20	21377810	10.93261667	1.72E-26
2	38302186	10.93236605	1.72E-26
5	92906458	10.93112661	1.74E-26
1	21671691	10.93110403	1.74E-26
9	100616807	10.93034151	1.76E-26
10	120355736	10.9303335	1.76E-26
17	77814365	10.92847981	1.79E-26
15	31776012	10.92719467	1.81E-26
22	46440061	-10.92311879	1.89E-26
6	106611942	-10.9216114	1.91E-26
19	1082949	-10.92157951	1.92E-26
9	99374427	-10.92106336	1.93E-26
11	9025362	10.91963643	1.95E-26
1	62072468	-10.91900828	1.96E-26
2	66651619	-10.91583702	2.03E-26
5	175223740	10.91493738	2.05E-26
19	19245551	10.9147456	2.05E-26
2	42720298	10.91429578	2.06E-26
1	53308455	10.91357294	2.07E-26
6	100913172	10.91164662	2.11E-26
11	124791139	10.91147505	2.12E-26
14	65008590	10.91118555	2.12E-26
10	120355756	10.90972959	2.15E-26
17	28562700	10.90767413	2.20E-26
17	28562691	10.90556512	2.25E-26
19	49015596	-10.90541223	2.25E-26
16	47177606	10.90369173	2.29E-26
18	19751644	10.90326583	2.30E-26
22	44258463	10.90307655	2.30E-26
19	1082954	-10.90051154	2.36E-26
7	130418913	10.9002653	2.37E-26
6	105389001	10.90011472	2.37E-26
2	42720293	10.89946137	2.39E-26
11	64480759	10.89918117	2.39E-26
9	140772351	10.89689521	2.45E-26
8	11566274	10.89507744	2.49E-26
6	100913176	10.89473264	2.50E-26
21	22535121	-10.89445991	2.51E-26
5	175223802	10.8937731	2.52E-26
15	58357431	10.89350827	2.53E-26
20	21377885	10.89276752	2.55E-26
8	27405803	-10.8926288	2.55E-26
5	175223762	10.89261766	2.55E-26
5	175223806	10.89223371	2.56E-26
8	11566210	10.89121249	2.59E-26
20	21377858	10.89103499	2.59E-26
17	28562683	10.89072697	2.60E-26
4	139619783	-10.88880288	2.65E-26
20	21377890	10.88848573	2.66E-26
3	32858998	10.88848565	2.66E-26
8	96705706	-10.8865624	2.71E-26
2	42720943	10.88620031	2.72E-26
1	21671674	10.88552275	2.74E-26
12	63544264	10.88451393	2.77E-26
10	72015259	10.88411279	2.78E-26
2	38301874	10.88364002	2.79E-26
9	140024685	10.8821193	2.83E-26
5	16179669	10.88170048	2.85E-26
12	63544262	10.88163352	2.85E-26
2	242498305	10.88139647	2.85E-26
11	59943432	-10.88094789	2.87E-26
15	31776043	10.88072277	2.87E-26
19	33167456	10.88037566	2.88E-26
20	21377830	10.8798273	2.90E-26
20	21377892	10.87974258	2.90E-26
7	8482515	10.87909235	2.92E-26
2	38301880	10.87896421	2.92E-26
3	71478053	-10.87703753	2.98E-26
12	63544270	10.87669392	2.99E-26
22	39941954	10.87615942	3.01E-26
18	19751642	10.87348199	3.09E-26
15	79576161	10.87200782	3.13E-26
10	115513292	-10.87053992	3.18E-26
7	32467495	10.87005229	3.19E-26
15	62456287	10.86976346	3.20E-26
6	106611947	-10.86880667	3.23E-26
2	66651631	-10.86817569	3.25E-26
18	44781091	10.86690684	3.29E-26
15	58357437	10.86666145	3.30E-26
1	53308478	10.86643314	3.31E-26
9	134989682	10.86638133	3.31E-26
6	11044867	10.86523426	3.35E-26
7	130418910	10.86353259	3.41E-26
8	11566283	10.86260403	3.44E-26
11	75140931	10.86225337	3.45E-26
11	75141148	10.86201802	3.46E-26
22	44258459	10.86078229	3.50E-26
15	31775371	10.86061183	3.51E-26
7	20824488	10.85977964	3.54E-26
14	99642589	-10.85936335	3.55E-26
7	130418920	10.8591652	3.56E-26
1	207996690	-10.8576676	3.61E-26
8	41753860	10.85759136	3.61E-26
1	186775820	-10.85636369	3.66E-26
20	21377849	10.85576572	3.68E-26
19	45655819	10.85467155	3.72E-26
1	21671650	10.85251246	3.80E-26
8	11566257	10.85208583	3.82E-26
14	93389819	10.84790978	3.98E-26
10	120355734	10.84511626	4.09E-26
7	130706741	-10.84400913	4.13E-26
4	8582483	10.843244	4.16E-26
11	82442996	10.84317296	4.17E-26
9	136474265	10.84195239	4.22E-26
6	106611961	-10.84132229	4.24E-26
17	30651386	-10.84087657	4.26E-26
2	42720810	10.84025161	4.29E-26
22	44258468	10.83909899	4.34E-26
3	32859039	10.83876292	4.35E-26
12	84902648	-10.83853846	4.36E-26
3	51990051	10.83842375	4.37E-26
5	175223755	10.83836632	4.37E-26
3	13590802	10.83683736	4.44E-26
12	11653523	10.8357398	4.48E-26
12	114087074	-10.83301726	4.61E-26
9	86088601	-10.83238766	4.64E-26
6	100316168	10.83163904	4.67E-26
7	20824457	10.83051253	4.72E-26
15	31776018	10.82990932	4.75E-26
6	107955980	10.82909231	4.79E-26
14	93389553	10.827407	4.87E-26
2	110372326	10.82715736	4.88E-26
2	38302189	10.82631778	4.92E-26
6	100913108	10.82564615	4.95E-26
7	8482581	10.82555643	4.96E-26
19	33167454	10.82545215	4.96E-26
15	31775541	10.82220463	5.13E-26
10	120355705	10.82179058	5.15E-26
6	100316158	10.82110451	5.18E-26
9	140772412	10.82098868	5.19E-26
7	140753625	-10.82095725	5.19E-26
11	82442988	10.81857227	5.31E-26
3	13590797	10.81832805	5.33E-26
3	32858995	10.81707078	5.39E-26
9	140024698	10.8145779	5.53E-26
5	166410419	-10.81310296	5.61E-26
9	140024671	10.81254003	5.64E-26
19	54976654	-10.8118932	5.67E-26
19	19245583	10.81183177	5.68E-26
1	91183279	10.81104032	5.72E-26
3	71478205	-10.81050263	5.75E-26
9	140772317	10.81022521	5.77E-26
2	38302196	10.80886696	5.85E-26
7	20824481	10.80840224	5.87E-26
4	8582505	10.80737171	5.93E-26
9	140024679	10.80730008	5.94E-26
12	12178131	-10.80723299	5.94E-26
16	47177597	10.80720632	5.94E-26
3	136882318	-10.80489269	6.08E-26
19	15343077	10.80416599	6.12E-26
20	21377854	10.80350008	6.16E-26
14	65009125	10.80249327	6.23E-26
2	38302182	10.80213572	6.25E-26
10	115513308	-10.80121169	6.30E-26
8	41753712	10.80069996	6.34E-26
22	39941974	10.80036984	6.36E-26
1	21671669	10.80003248	6.38E-26
6	11044873	10.79959013	6.41E-26
19	1082972	-10.79933963	6.42E-26
3	13590805	10.79783602	6.52E-26
8	11566333	10.79734769	6.55E-26
10	122040327	-10.79628475	6.62E-26
14	65008976	10.79550055	6.67E-26
14	65009115	10.79378411	6.78E-26
17	30651468	-10.790461	7.01E-26
20	21377812	10.79012825	7.03E-26
3	51990032	10.78859737	7.14E-26
5	175223745	10.78849753	7.15E-26
9	140024804	10.7867263	7.27E-26
6	105389229	10.78616107	7.31E-26
6	105389211	10.7843877	7.44E-26
7	20824491	10.78365577	7.49E-26
2	145278477	-10.77923552	7.83E-26
2	110372265	10.77889353	7.85E-26
6	110737031	-10.77859196	7.88E-26
3	127347880	10.77804333	7.92E-26
3	71478889	-10.77794528	7.93E-26
18	19751623	10.77732525	7.98E-26
2	242498334	10.77645158	8.05E-26
3	68981548	10.77596474	8.08E-26
14	65009046	10.77490649	8.17E-26
1	53308911	10.77381658	8.26E-26
5	175223758	10.77155305	8.44E-26
19	19245597	10.77129705	8.46E-26
9	140772291	10.77097491	8.49E-26
8	11566200	10.77079275	8.51E-26
7	130418942	10.76934657	8.63E-26
6	100913192	10.76904136	8.65E-26
7	32467626	10.76740798	8.79E-26
6	145562585	-10.76701274	8.83E-26
9	100616814	10.76594796	8.92E-26
22	44258437	10.76591449	8.92E-26
6	100913217	10.76572832	8.94E-26
4	147558252	10.76511418	8.99E-26
19	1082961	-10.76470002	9.03E-26
8	11566373	10.7644825	9.05E-26
13	25744932	10.76364146	9.13E-26
10	102321849	10.76239277	9.24E-26
4	8582463	10.76094888	9.37E-26
14	65009061	10.76073092	9.39E-26
3	51990027	10.75810723	9.64E-26
19	33167572	10.75672193	9.77E-26
4	147558243	10.75447996	9.98E-26
14	23450956	10.75407354	1.00E-25
5	175223749	10.75318417	1.01E-25
9	140024637	10.75276648	1.02E-25
19	39997711	10.75069817	1.04E-25
6	105389232	10.75017168	1.04E-25
8	11566272	10.74992354	1.04E-25
18	72214000	-10.74913431	1.05E-25
13	25745049	10.74901875	1.05E-25
2	42720708	10.7488547	1.06E-25
3	51990044	10.74585253	1.09E-25
14	65009101	10.74480757	1.10E-25
19	58095105	10.74306964	1.12E-25
5	86214363	-10.74305914	1.12E-25
3	127347830	10.74267598	1.12E-25
4	129308323	-10.73927368	1.16E-25
7	20824446	10.73926704	1.16E-25
11	124736397	10.7392234	1.16E-25
19	49015547	-10.73895921	1.16E-25
19	18343840	10.73603194	1.20E-25
2	42720947	10.73553538	1.20E-25
4	48485429	10.7353808	1.20E-25
14	100070149	10.73510235	1.21E-25
3	115854624	-10.7340564	1.22E-25
19	39997777	10.73343121	1.23E-25
3	13590794	10.73340603	1.23E-25
1	210111614	10.73165029	1.25E-25
1	210111641	10.7298714	1.27E-25
9	140033886	10.72908249	1.28E-25
15	70492350	-10.72782044	1.30E-25
2	242498340	10.72431938	1.34E-25
4	8582469	10.7232326	1.36E-25
1	21671646	10.72256827	1.37E-25
8	11566195	10.72193011	1.37E-25
22	44258426	10.7215594	1.38E-25
6	11044875	10.72101408	1.39E-25
8	91343077	-10.71975629	1.40E-25
3	127347833	10.7166804	1.45E-25
3	51990185	10.71646071	1.45E-25
13	36295584	-10.7161062	1.45E-25
6	105389236	10.71592565	1.46E-25
14	60982406	10.71438184	1.48E-25
11	64480769	10.71339	1.49E-25
2	42720820	10.71313884	1.50E-25
22	44258457	10.71297558	1.50E-25
2	242498346	10.71206527	1.51E-25
11	124736391	10.71159795	1.52E-25
16	47177595	10.71095644	1.53E-25
6	100913123	10.7102323	1.54E-25
14	65008981	10.70931745	1.55E-25
9	139093751	10.70919709	1.56E-25
8	11566112	10.70877828	1.56E-25
3	193989459	-10.70798109	1.58E-25
9	140772288	10.70797341	1.58E-25
7	50627961	-10.70724071	1.59E-25
1	155959029	-10.70575691	1.61E-25
2	39187483	10.70543497	1.61E-25
9	100616801	10.70111805	1.68E-25
9	140772326	10.69889672	1.72E-25
1	91183281	10.69884994	1.72E-25
11	124791074	10.69592589	1.77E-25
9	139093670	10.6956836	1.78E-25
16	47177592	10.69347443	1.82E-25
8	11566226	10.69332083	1.82E-25
2	39187470	10.69320821	1.82E-25
6	100913214	10.69272611	1.83E-25
17	28562685	10.68946385	1.89E-25
14	65008641	10.68914891	1.89E-25
14	65008578	10.68913097	1.89E-25
6	105389215	10.68860049	1.90E-25
6	107955880	10.68762392	1.92E-25
15	31776031	10.68688525	1.94E-25
15	62456327	10.68645378	1.94E-25
1	24718361	-10.68497966	1.97E-25
3	115854632	-10.68384521	1.99E-25
6	100913099	10.68384056	1.99E-25
4	48485432	10.68035123	2.06E-25
13	49794970	10.67741913	2.12E-25
2	42720837	10.67741816	2.12E-25
11	60718816	10.67618124	2.15E-25
2	42720835	10.67570999	2.16E-25
8	96705693	-10.67410688	2.19E-25
2	42720956	10.67393434	2.20E-25
22	44258465	10.67265154	2.22E-25
15	62456321	10.67259136	2.23E-25
19	49015582	-10.67237328	2.23E-25
15	70492394	-10.67201766	2.24E-25
19	19651243	10.67201278	2.24E-25
19	15343030	10.67137966	2.25E-25
20	44658303	10.67094963	2.26E-25
9	140024677	10.66871529	2.31E-25
4	8582461	10.6683075	2.32E-25
19	49015588	-10.66821089	2.32E-25
6	107956097	10.66749858	2.34E-25
14	23450908	10.66699665	2.35E-25
19	33167449	10.66440154	2.41E-25
17	28562703	10.66408556	2.42E-25
3	51990042	10.66276892	2.45E-25
16	47177587	10.65929234	2.53E-25
12	12178161	-10.65870556	2.55E-25
10	102321847	10.65710106	2.59E-25
3	32859015	10.65472033	2.65E-25
8	11566331	10.65280336	2.70E-25
19	39997779	10.6527915	2.70E-25
7	121969464	10.65251414	2.71E-25
2	38301937	10.65167477	2.73E-25
1	24718350	-10.65160123	2.73E-25
11	75141157	10.64937516	2.79E-25
7	20824494	10.6491472	2.80E-25
6	11044764	10.64911714	2.80E-25
3	32858988	10.64904358	2.80E-25
9	139093672	10.64886646	2.81E-25
13	36295562	-10.64848422	2.82E-25
15	62456285	10.6450998	2.91E-25
3	32859013	10.64464151	2.92E-25
6	25652622	10.64315141	2.97E-25
3	32858986	10.64221341	2.99E-25
15	62456331	10.64215427	3.00E-25
6	100316170	10.63993801	3.06E-25
9	100616816	10.63958066	3.07E-25
1	210111438	10.63943757	3.08E-25
3	32859010	10.63926751	3.08E-25
22	39941946	10.63923995	3.08E-25
5	16179627	10.63920224	3.08E-25
6	100913185	10.63917841	3.08E-25
2	242498352	10.63867614	3.10E-25
2	110372330	10.63790561	3.12E-25
1	210111445	10.63764489	3.13E-25
3	115854638	-10.6370611	3.15E-25
22	44258448	10.63576872	3.19E-25
11	9025359	10.63377674	3.25E-25
2	42720823	10.63180417	3.31E-25
7	130418939	10.6315021	3.32E-25
7	8482313	10.63033103	3.36E-25
11	124736387	10.62744967	3.46E-25
3	71478914	-10.62606804	3.50E-25
9	100616804	10.62436534	3.56E-25
14	65009049	10.62307763	3.61E-25
1	91183213	10.62248727	3.63E-25
11	64615087	-10.62240353	3.63E-25
3	193989505	-10.62222754	3.64E-25
7	2646805	-10.62086197	3.68E-25
5	175223764	10.62001012	3.72E-25
2	42720701	10.61974272	3.73E-25
8	11566322	10.61957837	3.73E-25
8	106334016	-10.61950526	3.73E-25
5	63461232	-10.61703303	3.82E-25
2	42720286	10.6166742	3.84E-25
3	71478898	-10.61559844	3.88E-25
6	100316174	10.61487407	3.91E-25
11	82443004	10.61329481	3.97E-25
8	18244861	10.61240444	4.00E-25
5	175223729	10.61220474	4.01E-25
20	41343372	-10.61136152	4.04E-25
11	75141161	10.61005191	4.09E-25
2	38301867	10.6098372	4.10E-25
19	19651246	10.60953878	4.11E-25
2	242498303	10.60899053	4.14E-25
4	147558272	10.60815491	4.17E-25
1	21671700	10.6069667	4.22E-25
11	75141152	10.60692785	4.22E-25
15	31776022	10.60576877	4.27E-25
3	13590819	10.60269521	4.40E-25
[truncated: 78,004 more rows]
