# Supplementary material for: Epigenetic Aging in Major Depressive Disorder
Source: Atypon-hosted journal article supplement (doi:10.1176/appi.ajp.2018.17060595), 2018-04-16
Supplement: appi.ajp.2018.17060595.ds003.csv [file appi.ajp.2018.17060595.ds003.csv]

TABLE S2. Overview of the 100,000 CpG sites used to estimate
DNA methylation age in postmortem brain samples from
patients with major depressive disorder and controls
chr	position	t_stat	p_value
chr11	10514271	-7.313564577	6.77E-12
chr11	10514276	-7.188165672	1.40E-11
chr11	10514259	-7.00351095	4.04E-11
chr11	10514245	-6.99325236	4.28E-11
chr2	71819247	-6.811899508	1.19E-10
chr21	47628850	-6.593600656	4.01E-10
chr21	45413708	-6.506972319	6.44E-10
chr8	116441690	-6.451579937	8.71E-10
chr8	116441696	-6.432531531	9.65E-10
chr2	71819253	-6.430315055	9.77E-10
chr21	45413714	-6.420782583	1.03E-09
chr10	133881301	-6.407121168	1.11E-09
chr8	116441679	-6.378633278	1.29E-09
chr21	47628866	-6.359142661	1.43E-09
chr14	101272553	-6.316245496	1.81E-09
chr11	130238368	-6.287669553	2.11E-09
chr6	158461936	-6.273775685	2.27E-09
chr21	45413723	-6.253592543	2.52E-09
chr11	61526387	-6.230739802	2.85E-09
chr11	130238362	-6.205015984	3.27E-09
chr5	178775428	-6.199462897	3.37E-09
chr11	130238357	-6.185341236	3.63E-09
chr12	110294019	-6.181454344	3.70E-09
chr10	128310600	-6.175322474	3.82E-09
chr10	133881320	-6.169102793	3.95E-09
chr21	47628897	-6.164845959	4.04E-09
chr1	212733191	-6.12641367	4.95E-09
chr17	73699745	-6.084533409	6.17E-09
chr6	158461989	-6.053199732	7.26E-09
chr10	73038489	-6.044114324	7.61E-09
chr9	13123198	-6.033131011	8.06E-09
chr10	133881282	-6.02642289	8.35E-09
chr21	45413725	-6.026312749	8.35E-09
chr17	76232157	-5.986103818	1.03E-08
chr19	12125781	5.939167365	1.31E-08
chr10	133875210	-5.935855031	1.33E-08
chr6	158462005	-5.934096521	1.35E-08
chr16	907532	5.928251786	1.39E-08
chr8	38352849	-5.907870713	1.54E-08
chr8	27377169	-5.904348608	1.57E-08
chr21	45413688	-5.90006349	1.60E-08
chr11	61526377	-5.882523389	1.76E-08
chr1	212733175	-5.872803752	1.85E-08
chr10	73038475	-5.86624764	1.91E-08
chr21	47628903	-5.858385597	1.99E-08
chr17	76529270	-5.845133743	2.13E-08
chr1	212733182	-5.843594625	2.14E-08
chr11	19582795	-5.843323315	2.14E-08
chr6	158462039	-5.841597148	2.16E-08
chr3	195906847	-5.838012353	2.20E-08
chr9	13123226	-5.803835983	2.62E-08
chr1	212733199	-5.802767335	2.64E-08
chr8	116441764	-5.801924573	2.65E-08
chr8	140981346	-5.790292468	2.81E-08
chr17	76529262	-5.776545954	3.01E-08
chr15	51585736	-5.775582014	3.03E-08
chr8	116441737	-5.769219033	3.13E-08
chr2	239033874	-5.767274085	3.16E-08
chr1	4804163	-5.742052394	3.59E-08
chr17	76529281	-5.733422716	3.74E-08
chr1	212733230	-5.732839216	3.76E-08
chr4	42160491	-5.730072329	3.81E-08
chr7	51253537	-5.727993525	3.85E-08
chr7	51253552	-5.726558537	3.88E-08
chr14	102413165	-5.72488266	3.91E-08
chr10	133881363	-5.724047274	3.93E-08
chr6	158462008	-5.722627476	3.95E-08
chr10	73038463	-5.702355039	4.38E-08
chr8	99009470	-5.694434463	4.56E-08
chr2	71819229	-5.693751184	4.57E-08
chr11	19582830	-5.690779184	4.64E-08
chr6	161565283	-5.653922322	5.58E-08
chr9	13123214	-5.63342675	6.18E-08
chr6	134946580	-5.630070498	6.28E-08
chr15	45364616	-5.624841642	6.45E-08
chr4	16817558	5.623857901	6.48E-08
chr14	94188098	-5.617452107	6.69E-08
chr1	4804142	-5.606292961	7.07E-08
chr19	43372306	-5.60300917	7.19E-08
chr17	73699714	-5.602648236	7.20E-08
chr17	75746461	-5.601417255	7.25E-08
chr11	19582847	-5.600190487	7.29E-08
chr14	94200695	-5.599995224	7.30E-08
chr6	161565289	-5.5943226	7.51E-08
chr6	39820324	-5.590637292	7.64E-08
chr4	188369775	5.587932951	7.75E-08
chr8	18461270	-5.587898772	7.75E-08
chr10	133881263	-5.585186767	7.85E-08
chr14	102413185	-5.581503384	8.00E-08
chr6	161565304	-5.579435236	8.08E-08
chr1	43817218	-5.577741332	8.15E-08
chr1	43817232	-5.576324126	8.21E-08
chr17	73699776	-5.574790101	8.27E-08
chr21	45413679	-5.568819074	8.52E-08
chr12	110294003	-5.567559335	8.57E-08
chr1	66498558	-5.566160875	8.63E-08
chr19	2424484	-5.56347399	8.74E-08
chr2	242799813	-5.555684754	9.09E-08
chr7	51253599	-5.551826044	9.26E-08
chr2	228882732	-5.546809796	9.49E-08
chr4	42160495	-5.545299648	9.56E-08
chr17	76232152	-5.544771618	9.59E-08
chr11	19582864	-5.54426887	9.61E-08
chr19	58094769	5.542234955	9.71E-08
chr13	49878713	-5.541058715	9.77E-08
chr8	27377162	-5.528737112	1.04E-07
chr1	12199029	-5.521910977	1.07E-07
chr15	92611423	-5.510320016	1.14E-07
chr15	39115536	5.509876537	1.14E-07
chr19	22799672	-5.507108509	1.15E-07
chr8	18461246	-5.505326789	1.16E-07
chr1	6161163	-5.503602749	1.17E-07
chr14	102413171	-5.500498759	1.19E-07
chr5	178775420	-5.500193197	1.19E-07
chr5	137057949	-5.498311114	1.20E-07
chr2	242680522	-5.490854571	1.25E-07
chr17	76232178	-5.490560144	1.25E-07
chr17	76232234	-5.48690414	1.27E-07
chr3	147130449	5.486139176	1.28E-07
chr10	123369541	-5.485362198	1.28E-07
chr17	10710064	-5.485063442	1.29E-07
chr17	73699783	-5.484202532	1.29E-07
chr1	12199016	-5.48213213	1.30E-07
chr22	38382010	-5.478149464	1.33E-07
chr10	133881382	-5.477910825	1.33E-07
chr13	30909586	-5.475301136	1.35E-07
chr5	176076015	-5.468258701	1.40E-07
chr7	51253585	-5.46569647	1.41E-07
chr17	67520106	-5.464411655	1.42E-07
chr22	49280225	-5.464056639	1.42E-07
chr2	8571304	-5.463827676	1.43E-07
chr13	42107523	-5.45975788	1.45E-07
chr2	233506069	-5.459459108	1.46E-07
chr8	99009492	-5.458557456	1.46E-07
chr11	19582876	-5.455967752	1.48E-07
chr13	42107490	-5.455314611	1.49E-07
chr1	2391089	-5.454388554	1.49E-07
chr6	39820342	-5.453369247	1.50E-07
chr5	176076001	-5.451323589	1.52E-07
chr11	19582872	-5.450916184	1.52E-07
chr8	99009476	-5.449162519	1.53E-07
chr4	154096584	-5.446150515	1.55E-07
chr6	158462022	-5.443796591	1.57E-07
chr19	53858773	-5.44270799	1.58E-07
chr16	67131246	5.440181104	1.60E-07
chr17	26559189	-5.436781884	1.63E-07
chr8	54573841	-5.436164251	1.63E-07
chr18	21119357	5.435245026	1.64E-07
chr1	90447256	-5.434668743	1.64E-07
chr22	38381995	-5.434272869	1.65E-07
chr13	30909593	-5.432275479	1.66E-07
chr1	225705133	-5.428882015	1.69E-07
chr1	26597588	-5.425352781	1.72E-07
chr18	3792961	-5.424652371	1.73E-07
chr7	142983088	-5.42262788	1.74E-07
chr10	129056577	-5.42072928	1.76E-07
chr4	190514623	5.41938563	1.77E-07
chr2	8571287	-5.411038995	1.84E-07
chr4	7315877	-5.410642377	1.85E-07
chr1	225705136	-5.407777746	1.87E-07
chr22	49280220	-5.405269656	1.90E-07
chr13	25771139	-5.404457403	1.90E-07
chr17	26559211	-5.404367637	1.90E-07
chr10	43724432	5.401615628	1.93E-07
chr1	203137572	-5.398872508	1.96E-07
chr8	140981339	-5.39708088	1.97E-07
chr5	53846555	-5.396219112	1.98E-07
chr16	907514	5.393762195	2.00E-07
chr6	2191048	-5.392297138	2.02E-07
chr11	1462422	-5.391653244	2.03E-07
chr4	41327209	-5.390432871	2.04E-07
chr12	94964737	-5.389937117	2.04E-07
chr12	124868535	-5.389084956	2.05E-07
chr20	62747408	-5.387837606	2.06E-07
chr15	51585730	-5.387307321	2.07E-07
chr13	67730411	-5.386675958	2.07E-07
chr8	54573876	-5.38648648	2.08E-07
chr4	7315873	-5.383988427	2.10E-07
chr11	61526369	-5.382348783	2.12E-07
chr4	188369728	5.382269842	2.12E-07
chr18	3792945	-5.375032915	2.19E-07
chr9	137164385	-5.373786344	2.21E-07
chr16	907537	5.372608835	2.22E-07
chr7	45003294	-5.37065559	2.24E-07
chr17	10710077	-5.369924721	2.25E-07
chr10	133881220	-5.369384114	2.25E-07
chr1	26597583	-5.369190751	2.26E-07
chr10	134904860	-5.369181131	2.26E-07
chr22	38508291	-5.365286149	2.30E-07
chr16	907509	5.361935038	2.34E-07
chr2	58358974	-5.360439174	2.35E-07
chr1	90447245	-5.35941519	2.37E-07
chr1	110425373	-5.359336435	2.37E-07
chr12	110294001	-5.35649155	2.40E-07
chr1	90447224	-5.352743455	2.44E-07
chr6	170552499	-5.352036247	2.45E-07
chr5	120442931	-5.350479957	2.47E-07
chr1	90447249	-5.348604837	2.49E-07
chr10	129056589	-5.348603445	2.49E-07
chr15	45364623	-5.343718886	2.55E-07
chr17	76232147	-5.342847648	2.56E-07
chr2	26706469	-5.342778794	2.56E-07
chr2	240265617	-5.340902324	2.59E-07
chr1	225705130	-5.340884425	2.59E-07
chr20	18730519	-5.340761615	2.59E-07
chr5	171868428	-5.340677456	2.59E-07
chr4	188369781	5.33679803	2.64E-07
chr1	16930034	-5.336627619	2.64E-07
chr10	123369546	-5.336284282	2.64E-07
chr10	63812596	-5.334552721	2.67E-07
chr12	124868545	-5.333011175	2.69E-07
chr8	38352861	-5.331723794	2.70E-07
chr3	195906836	-5.331544287	2.71E-07
chr13	49878696	-5.329948095	2.73E-07
chr20	56007115	-5.326851483	2.77E-07
chr11	64739671	5.325028115	2.79E-07
chr13	25771152	-5.324754357	2.79E-07
chr5	137057942	-5.324476432	2.80E-07
chr6	43457962	-5.319150056	2.87E-07
chr9	126755512	5.318864505	2.87E-07
chr2	98804286	-5.318363747	2.88E-07
chr1	26597578	-5.3176748	2.89E-07
chr17	652386	-5.317072283	2.90E-07
chr15	102304193	-5.314693638	2.93E-07
chr6	163785984	-5.313850266	2.94E-07
chr4	79430023	-5.313630501	2.95E-07
chr16	2103268	-5.313612189	2.95E-07
chr2	58358990	-5.308219452	3.03E-07
chr6	155454985	5.30725357	3.04E-07
chr1	12104685	-5.305764668	3.06E-07
chr1	34835426	-5.304512552	3.08E-07
chr19	20797150	-5.303661543	3.09E-07
chr1	120284539	-5.301723276	3.12E-07
chr14	102413127	-5.29981507	3.15E-07
chr2	98804279	-5.296743899	3.20E-07
chr6	162720257	-5.294630409	3.23E-07
chr14	103777785	-5.293291197	3.25E-07
chr16	67131238	5.289526682	3.31E-07
chr22	50854666	-5.289306196	3.31E-07
chr8	18461239	-5.287356192	3.34E-07
chr17	26559196	-5.286063411	3.36E-07
chr1	225705111	-5.285973826	3.36E-07
chr6	134946576	-5.28461331	3.39E-07
chr3	147130454	5.283364855	3.41E-07
chr17	76232255	-5.282917741	3.41E-07
chr16	86029962	-5.280945177	3.45E-07
chr3	193535219	-5.279666518	3.47E-07
chr20	58298790	-5.278685805	3.48E-07
chr8	99009497	-5.272048466	3.60E-07
chr2	233756603	-5.266828276	3.69E-07
chr3	126552401	-5.26499292	3.72E-07
chr16	437148	-5.264707416	3.72E-07
chr9	92000027	-5.263873341	3.74E-07
chr1	6161175	-5.26179649	3.78E-07
chr14	36543828	-5.260475891	3.80E-07
chr6	132916375	-5.259878092	3.81E-07
chr1	90447221	-5.258842688	3.83E-07
chr11	93240029	-5.256939051	3.86E-07
chr6	129599786	-5.255800939	3.88E-07
chr6	156874129	-5.253275339	3.93E-07
chr6	2432284	-5.250739549	3.98E-07
chr11	721730	-5.249574567	4.00E-07
chr16	86029970	-5.248721188	4.02E-07
chr6	170395449	-5.247845906	4.03E-07
chr11	2919798	-5.246420292	4.06E-07
chr9	71107848	5.245933634	4.07E-07
chr6	157787354	-5.245277662	4.08E-07
chr9	126755483	5.242898309	4.13E-07
chr3	16419436	-5.242026737	4.15E-07
chr11	7282928	-5.239126617	4.20E-07
chr12	123341863	-5.236427046	4.26E-07
chr12	123341805	-5.234380948	4.30E-07
chr22	38508248	-5.233844094	4.31E-07
chr7	45003289	-5.232874101	4.33E-07
chr3	16419457	-5.232799268	4.33E-07
chr12	78770	-5.232240171	4.34E-07
chr1	236267584	5.23186831	4.35E-07
chr2	233506048	-5.231793162	4.35E-07
chr2	71819221	-5.23117288	4.37E-07
chr13	49878718	-5.229509736	4.40E-07
chr3	163727152	-5.2292546	4.41E-07
chr9	114738421	-5.228718179	4.42E-07
chr14	105448266	-5.228596307	4.42E-07
chr8	94786522	5.227991602	4.43E-07
chr17	67520151	-5.22366556	4.52E-07
chr8	27377146	-5.22310629	4.54E-07
chr12	1749516	-5.221227704	4.58E-07
chr2	230209565	-5.218651563	4.63E-07
chr1	31239374	-5.217453302	4.66E-07
chr18	12301576	-5.20909325	4.85E-07
chr14	95727448	-5.2078558	4.87E-07
chr14	94188114	-5.206407251	4.91E-07
chr17	652419	-5.204172374	4.96E-07
chr1	236267556	5.203058165	4.99E-07
chr6	169631614	-5.20232103	5.00E-07
chr6	164506306	-5.202070772	5.01E-07
chr9	87636327	-5.202047284	5.01E-07
chr7	153362839	-5.201197329	5.03E-07
chr6	3353119	-5.201097203	5.03E-07
chr20	47327319	-5.200740257	5.04E-07
chr1	37773942	-5.198267368	5.10E-07
chr11	130238326	-5.19824292	5.10E-07
chr15	92611418	-5.197538035	5.12E-07
chr1	16930030	-5.196982801	5.13E-07
chr2	58358962	-5.195727359	5.16E-07
chr1	200344614	-5.195380229	5.17E-07
chr17	75746437	-5.192656426	5.24E-07
chr10	64573280	5.192043939	5.25E-07
chr10	128241139	-5.192000004	5.25E-07
chr9	133946648	-5.190466552	5.29E-07
chr8	141536508	-5.190215114	5.30E-07
chr10	123369535	-5.189234593	5.32E-07
chr4	4864711	5.189125296	5.32E-07
chr16	67131219	5.184735078	5.44E-07
chr1	110425377	-5.182003594	5.51E-07
chr4	140423004	-5.181040381	5.53E-07
chr10	49791120	-5.178521134	5.60E-07
chr2	45165486	5.177761904	5.62E-07
chr9	6730844	-5.177327246	5.63E-07
chr12	133384772	5.176968965	5.64E-07
chr6	169192694	-5.176658078	5.65E-07
chr3	195906834	-5.176358733	5.65E-07
chr18	46388847	-5.176140298	5.66E-07
chr10	116761368	-5.174502473	5.70E-07
chr9	92000044	-5.173371438	5.73E-07
chr2	237624464	-5.173007184	5.74E-07
chr10	49791149	-5.172772501	5.75E-07
chr7	142983107	-5.171150174	5.79E-07
chr4	141227400	-5.171063412	5.80E-07
chr12	133384768	5.170150118	5.82E-07
chr6	164506304	-5.170135206	5.82E-07
chr22	50351518	-5.168144795	5.88E-07
chr19	47882777	-5.167935612	5.88E-07
chr8	54573873	-5.167883648	5.88E-07
chr1	200344649	-5.16625316	5.93E-07
chr11	93240020	-5.165711709	5.94E-07
chr8	141076508	-5.163581733	6.00E-07
chr6	3353134	-5.16269207	6.03E-07
chr14	33363932	-5.162578591	6.03E-07
chr6	164506261	-5.160506643	6.09E-07
chr1	12104700	-5.159960695	6.11E-07
chr2	237624492	-5.159444452	6.12E-07
chr9	71107832	5.159383756	6.12E-07
chr19	53858790	-5.158336262	6.15E-07
chr10	133875196	-5.157151905	6.19E-07
chr17	55948674	-5.155922108	6.22E-07
chr6	129599797	-5.155599072	6.23E-07
chr16	86987619	-5.154409998	6.27E-07
chr11	19429002	-5.154117163	6.28E-07
chr10	116761362	-5.153343837	6.30E-07
chr6	169636884	-5.152822495	6.32E-07
chr5	9691135	-5.152782886	6.32E-07
chr20	47327331	-5.15265108	6.32E-07
chr4	887590	-5.152134393	6.34E-07
chr10	134553160	-5.151740238	6.35E-07
chr10	64573268	5.148679589	6.44E-07
chr19	51073343	-5.148115745	6.46E-07
chr6	17820539	-5.147424496	6.48E-07
chr3	23704141	-5.146144285	6.52E-07
chr4	184276568	-5.14526035	6.54E-07
chr6	157787389	-5.143581189	6.59E-07
chr9	126755454	5.143409633	6.60E-07
chr4	185673257	-5.143021509	6.61E-07
chr1	226840697	-5.141538144	6.66E-07
chr9	139409867	-5.140700056	6.68E-07
chr17	26559171	-5.14063764	6.69E-07
chr5	176076081	-5.139490044	6.72E-07
chr19	46477678	-5.138598437	6.75E-07
chr1	160850420	-5.137856773	6.77E-07
chr3	57145076	-5.13592188	6.84E-07
chr4	141227407	-5.135629096	6.85E-07
chr1	7293348	-5.13276217	6.94E-07
chr12	78776	-5.132618437	6.94E-07
chr4	141207903	5.132476237	6.95E-07
chr13	59079769	-5.132307535	6.95E-07
chr12	57626566	5.132174219	6.96E-07
chr22	37168661	-5.131753353	6.97E-07
chr8	141292087	-5.130306106	7.02E-07
chr5	176076026	-5.13011979	7.02E-07
chr16	11659505	-5.128927871	7.06E-07
chr5	176076043	-5.128653166	7.07E-07
chr4	79430007	-5.12814854	7.09E-07
chr15	39115573	5.125756126	7.17E-07
chr13	66923916	-5.125755724	7.17E-07
chr22	38096032	-5.12385312	7.23E-07
chr2	240118637	-5.12285879	7.27E-07
chr2	58358954	-5.121255598	7.32E-07
chr16	29333226	-5.119229473	7.39E-07
chr1	43817197	-5.117524375	7.45E-07
chr13	49878675	-5.116198086	7.50E-07
chr1	2098137	-5.115018793	7.54E-07
chr1	200344588	-5.114701406	7.55E-07
chr10	134553151	-5.114654655	7.55E-07
chr3	62356839	5.114546808	7.55E-07
chr5	137057975	-5.113193145	7.60E-07
chr7	155625010	-5.112335869	7.63E-07
chr19	47882795	-5.11112923	7.67E-07
chr19	39568048	-5.111113652	7.68E-07
chr10	131561025	-5.109817083	7.72E-07
chr3	62356720	5.109546254	7.73E-07
chr12	123341819	-5.109067215	7.75E-07
chr10	49791109	-5.108401012	7.77E-07
chr17	35291248	5.108366217	7.77E-07
chr11	2749237	-5.108202199	7.78E-07
chr10	133676533	-5.107735982	7.80E-07
chr16	85327028	-5.106997564	7.82E-07
chr17	77402704	5.105969284	7.86E-07
chr8	141536512	-5.105068133	7.89E-07
chr17	55948727	-5.104916522	7.90E-07
chr8	18461305	-5.104564941	7.91E-07
chr19	43372328	-5.103097925	7.97E-07
chr3	62356837	5.102636783	7.98E-07
chr6	137666926	-5.102598396	7.99E-07
chr1	34835434	-5.102525273	7.99E-07
chr6	169192674	-5.102515947	7.99E-07
chr4	31140206	-5.101836669	8.01E-07
chr16	437116	-5.100507041	8.06E-07
chr7	36640146	-5.099978393	8.08E-07
chr1	225705163	-5.099752348	8.09E-07
chr22	47362139	-5.098852786	8.13E-07
chr21	43400163	5.098576342	8.14E-07
chr10	49791161	-5.097932278	8.16E-07
chr1	3340086	-5.095976435	8.24E-07
chr19	43372262	-5.094992506	8.27E-07
chr9	44048776	5.094285561	8.30E-07
chr3	12688513	5.092951012	8.35E-07
chr10	129145861	-5.092802602	8.36E-07
chr3	188131332	-5.092635224	8.36E-07
chr4	41053656	-5.090786588	8.44E-07
chr10	1237082	-5.089240121	8.50E-07
chr4	154096602	-5.088961278	8.51E-07
chr10	105436988	-5.087508042	8.57E-07
chr4	140422994	-5.085707142	8.64E-07
chr6	2432266	-5.085573541	8.64E-07
chr20	3378090	-5.083246433	8.74E-07
chr1	236267589	5.083066511	8.74E-07
chr22	47362146	-5.08306271	8.75E-07
chr2	47285910	-5.082458074	8.77E-07
chr14	64835245	5.082113573	8.78E-07
chr9	92000065	-5.081950963	8.79E-07
chr1	9391302	-5.081580954	8.81E-07
chr1	2098129	-5.081066485	8.83E-07
chr4	41327170	-5.08082648	8.84E-07
chr3	147130477	5.080536742	8.85E-07
chr14	107281036	-5.080506215	8.85E-07
chr12	751156	-5.079488693	8.89E-07
chr22	38510210	-5.078917732	8.92E-07
chr5	45267328	5.076657452	9.01E-07
chr1	3340108	-5.075784523	9.05E-07
chr1	229237460	-5.075450579	9.06E-07
chr19	20797132	-5.075196135	9.07E-07
chr5	171868418	-5.074103754	9.12E-07
chr2	97633877	-5.073741429	9.13E-07
chr1	23133101	-5.072820146	9.17E-07
chr11	2919808	-5.072442793	9.19E-07
chr8	145846234	-5.071978315	9.21E-07
chr8	141536538	-5.071017886	9.25E-07
chr16	86987635	-5.07069736	9.26E-07
chr22	50351523	-5.070527581	9.27E-07
chr12	131016763	5.070474679	9.27E-07
chr3	23704129	-5.06996137	9.29E-07
chr1	236267546	5.067415486	9.40E-07
chr13	25771158	-5.066523964	9.44E-07
chr14	56523478	-5.065468095	9.49E-07
chr6	170395469	-5.06383909	9.56E-07
chr12	123341875	-5.062710227	9.61E-07
chr8	28975115	-5.060682548	9.70E-07
chr14	101712304	-5.059570174	9.75E-07
chr4	79430037	-5.059457029	9.76E-07
chr4	49310794	5.059304691	9.76E-07
chr9	139409912	-5.058013377	9.82E-07
chr17	55948716	-5.057316326	9.85E-07
chr5	17499676	5.056266684	9.90E-07
chr1	12198993	-5.055089938	9.96E-07
chr2	236885802	-5.054416388	9.99E-07
chr4	629301	-5.054208253	1.00E-06
chr13	113940420	-5.053768631	1.00E-06
chr2	240265604	-5.05334781	1.00E-06
chr12	109797284	-5.053167676	1.00E-06
chr17	67520163	-5.052797611	1.01E-06
chr1	3134721	-5.052530053	1.01E-06
chr19	46477688	-5.051826583	1.01E-06
chr19	46477686	-5.051259429	1.01E-06
chr2	240385747	-5.050655729	1.02E-06
chr8	38352809	-5.050276613	1.02E-06
chr6	162720223	-5.04974486	1.02E-06
chr8	143171467	-5.049173752	1.02E-06
chr18	60661313	-5.048901741	1.02E-06
chr5	55950274	-5.048635398	1.03E-06
chr7	45003280	-5.048595535	1.03E-06
chr16	2103262	-5.04835883	1.03E-06
chr20	55876671	-5.048293709	1.03E-06
chr7	21672636	5.04720834	1.03E-06
chr8	141292090	-5.047180936	1.03E-06
chr1	160850453	-5.045641794	1.04E-06
chr6	2191041	-5.045194252	1.04E-06
chr22	30951844	5.044220369	1.05E-06
chr9	110665843	-5.04392074	1.05E-06
chr6	167010692	-5.043807356	1.05E-06
chr18	21119368	5.043745155	1.05E-06
chr19	35589920	-5.042401428	1.06E-06
chr1	236267544	5.041795899	1.06E-06
chr11	64739736	5.041041601	1.06E-06
chr10	2184182	-5.039958949	1.07E-06
chr1	34835483	-5.039940296	1.07E-06
chr3	5470107	5.039491553	1.07E-06
chr10	77563719	-5.038040061	1.08E-06
chr1	39035974	-5.037909146	1.08E-06
chr19	58094759	5.037459561	1.08E-06
chr2	8571345	-5.036436959	1.09E-06
chr13	24200921	-5.035619004	1.09E-06
chr13	25771162	-5.035434326	1.09E-06
chr18	75899575	-5.035253601	1.09E-06
chr1	31189147	-5.034384563	1.10E-06
chr2	222302505	5.033020616	1.10E-06
chr7	625153	5.032940127	1.10E-06
chr17	8794693	-5.032575686	1.10E-06
chr20	46390980	-5.032150129	1.11E-06
chr6	499191	-5.032041445	1.11E-06
chr20	56007060	-5.031535538	1.11E-06
chr2	240118657	-5.031170579	1.11E-06
chr9	73110581	-5.030993906	1.11E-06
chr1	160850417	-5.030803943	1.11E-06
chr20	46391020	-5.030788281	1.11E-06
chr2	79204384	-5.030739506	1.11E-06
chr5	45267331	5.029878934	1.12E-06
chr19	39568042	-5.029385326	1.12E-06
chr19	35589939	-5.029078069	1.12E-06
chr6	169629684	-5.028679855	1.12E-06
chr17	67520147	-5.028328537	1.13E-06
chr1	70942948	5.027122315	1.13E-06
chr10	116335314	-5.026974129	1.13E-06
chr10	128310646	-5.025138096	1.14E-06
chr10	20281927	-5.025033726	1.14E-06
chr7	20182956	5.024678125	1.15E-06
chr1	229237445	-5.024011567	1.15E-06
chr13	111903487	-5.023786145	1.15E-06
chr17	80235447	-5.023473494	1.15E-06
chr11	2749243	-5.023052151	1.15E-06
chr11	1462409	-5.022618215	1.16E-06
chr10	118176719	-5.020372037	1.17E-06
chr4	6726911	-5.020162018	1.17E-06
chr22	49280191	-5.02007931	1.17E-06
chr7	625156	5.018076776	1.18E-06
chr2	110780990	-5.018040734	1.18E-06
chr10	43724442	5.016375519	1.19E-06
chr17	77402719	5.016066961	1.19E-06
chr14	105448261	-5.015868257	1.19E-06
chr5	176076048	-5.014993298	1.20E-06
chr4	141207896	5.01497145	1.20E-06
chr8	143171486	-5.014527987	1.20E-06
chr9	98903485	-5.012757273	1.21E-06
chr20	47327368	-5.012698904	1.21E-06
chr1	3090134	-5.012655384	1.21E-06
chr21	28212633	-5.010913494	1.22E-06
chr4	184922052	-5.010439903	1.22E-06
chr10	81151814	-5.009896443	1.23E-06
chr17	35291280	5.009889279	1.23E-06
chr19	47882841	-5.009777658	1.23E-06
chr5	90634076	-5.009663945	1.23E-06
chr1	39035968	-5.009565657	1.23E-06
chr22	39827454	-5.009239661	1.23E-06
chr10	1237079	-5.008971533	1.23E-06
chr1	12198988	-5.008859448	1.23E-06
chr5	132099293	-5.008446225	1.23E-06
chr2	239097730	-5.008332901	1.24E-06
chr2	120246045	-5.00698033	1.24E-06
chr5	82043292	-5.006594552	1.24E-06
chr22	50351505	-5.006544412	1.25E-06
chr9	74579867	-5.006451214	1.25E-06
chr3	16419459	-5.006114377	1.25E-06
chr7	137125894	-5.005753024	1.25E-06
chr15	45364647	-5.005140144	1.25E-06
chr11	19429078	-5.005019429	1.25E-06
chr17	18411223	-5.004742202	1.26E-06
chr17	27489361	-5.003546784	1.26E-06
chr11	33712206	-5.003364723	1.26E-06
chr14	56523457	-5.00313469	1.26E-06
chr6	3812303	-5.002923014	1.27E-06
chr5	39907768	5.001424534	1.27E-06
chr16	86987609	-5.00141903	1.27E-06
chr4	872981	5.001417479	1.27E-06
chr1	114431428	5.000976713	1.28E-06
chr10	81000209	-5.00037106	1.28E-06
chr2	222302503	5.000046369	1.28E-06
chr8	27377204	-4.999564806	1.29E-06
chr5	10287085	-4.998751377	1.29E-06
chr12	124848794	-4.998437629	1.29E-06
chr4	190514619	4.997984691	1.30E-06
chr22	37168743	-4.99775456	1.30E-06
chr11	33712237	-4.997655749	1.30E-06
chr12	124868525	-4.996215036	1.31E-06
chr8	25242870	-4.994941111	1.31E-06
chr19	12125831	4.994848328	1.31E-06
chr12	115576158	-4.994128666	1.32E-06
chr3	147130437	4.993885714	1.32E-06
chr2	230209549	-4.993546367	1.32E-06
chr18	3792928	-4.993430299	1.32E-06
chr19	42915942	-4.99323504	1.32E-06
chr9	139409872	-4.992449579	1.33E-06
chr20	55876636	-4.992193586	1.33E-06
chr12	562118	-4.991677765	1.33E-06
chr1	31239412	-4.990995422	1.34E-06
chr19	58094740	4.990665262	1.34E-06
chr6	162720200	-4.989523069	1.35E-06
chr8	143171456	-4.989388653	1.35E-06
chr13	42107452	-4.989115652	1.35E-06
chr7	102209085	-4.989058515	1.35E-06
chr2	234223432	-4.988676057	1.35E-06
chr16	69922119	-4.988051653	1.36E-06
chr10	49791142	-4.985631328	1.37E-06
chr10	43724426	4.985626897	1.37E-06
chr20	55876643	-4.985319424	1.37E-06
chr9	97844308	-4.985027067	1.37E-06
chr6	39820362	-4.984797283	1.38E-06
chr20	52076225	4.983052684	1.39E-06
chr17	55948680	-4.982671086	1.39E-06
chr17	62232700	-4.982218395	1.39E-06
chr5	171982107	-4.981789013	1.40E-06
chr14	94920053	4.980096622	1.41E-06
chr14	101312325	-4.97930539	1.41E-06
chr17	76529232	-4.979178364	1.41E-06
chr11	43132855	4.978503038	1.42E-06
chr5	55950299	-4.978494739	1.42E-06
chr18	3792985	-4.977527315	1.42E-06
chr16	57087277	4.976081803	1.43E-06
chr18	74721088	-4.975693782	1.43E-06
chr11	2749220	-4.975452187	1.44E-06
chr1	160056018	-4.975205124	1.44E-06
chr18	45533345	-4.974130667	1.44E-06
chr8	140981445	-4.974027175	1.45E-06
chr4	41327241	-4.973657602	1.45E-06
chr1	31189194	-4.973640879	1.45E-06
chr4	872957	4.973401206	1.45E-06
chr13	30909564	-4.973281214	1.45E-06
chr1	16930063	-4.973082756	1.45E-06
chr1	220894615	-4.972883386	1.45E-06
chr7	62581932	4.97278466	1.45E-06
chr15	45364636	-4.972199932	1.46E-06
chr16	437128	-4.970957453	1.47E-06
chr11	93240010	-4.970285356	1.47E-06
chr4	140422986	-4.969520372	1.48E-06
chr8	27377194	-4.969387296	1.48E-06
chr1	991992	4.968978148	1.48E-06
chr10	63812543	-4.968849889	1.48E-06
chr16	664429	4.968543221	1.48E-06
chr2	241633165	-4.968255489	1.48E-06
chr9	110126280	-4.967223754	1.49E-06
chr18	3138441	-4.966990685	1.49E-06
chr18	45533351	-4.96646188	1.50E-06
chr12	125460465	-4.966429464	1.50E-06
chr6	164506268	-4.965578016	1.50E-06
chr2	48433664	-4.965423538	1.50E-06
chr14	94188085	-4.964763864	1.51E-06
chr5	139038861	-4.964557008	1.51E-06
chr20	58298785	-4.964250955	1.51E-06
chr20	59549343	-4.964146201	1.51E-06
chr17	80235484	-4.96375433	1.51E-06
chr12	123341830	-4.963731832	1.52E-06
chr11	95253866	-4.963204222	1.52E-06
chr7	137125888	-4.963057931	1.52E-06
chr9	109383997	-4.962865927	1.52E-06
chr3	16268972	-4.962602977	1.52E-06
chr15	45364658	-4.961483977	1.53E-06
chr1	204236644	-4.960452233	1.54E-06
chr13	30909610	-4.959809947	1.54E-06
chr1	203137566	-4.959698006	1.54E-06
chr4	41327141	-4.958615974	1.55E-06
chr2	48433661	-4.958062624	1.55E-06
chr1	2391073	-4.957819658	1.56E-06
chr15	79271493	-4.956473207	1.57E-06
chr14	93470458	-4.955236972	1.57E-06
chr3	159778331	-4.954584371	1.58E-06
chr19	37266528	-4.954340851	1.58E-06
chr15	42699372	-4.95352663	1.59E-06
chr9	139409920	-4.95338541	1.59E-06
chr17	35291241	4.953115713	1.59E-06
chr1	39035952	-4.953017352	1.59E-06
chr5	92367846	-4.952951909	1.59E-06
chr1	229237426	-4.951998829	1.60E-06
chr4	659477	-4.951507711	1.60E-06
chr22	50114458	-4.950719708	1.61E-06
chr12	124868565	-4.95068771	1.61E-06
chr9	139409889	-4.950593988	1.61E-06
chr4	16817601	4.949417656	1.62E-06
chr16	57087279	4.948441971	1.62E-06
chr16	9765017	4.94712765	1.63E-06
chr1	226840727	-4.946682542	1.64E-06
chr2	138944951	-4.946642714	1.64E-06
chr10	2184223	-4.945478916	1.65E-06
chr6	169629696	-4.945345727	1.65E-06
chr11	118498818	-4.945061987	1.65E-06
chr10	2184201	-4.944951696	1.65E-06
chr7	20182948	4.944765895	1.65E-06
chr10	633982	-4.944524267	1.65E-06
chr10	633730	-4.944396244	1.65E-06
chr10	134904849	-4.944225644	1.66E-06
chr12	804489	4.943844691	1.66E-06
chr2	239097725	-4.942937627	1.67E-06
chr1	212733130	-4.942790536	1.67E-06
chr12	109797312	-4.942041679	1.67E-06
chr7	36640125	-4.941809677	1.67E-06
chr7	153362812	-4.941371863	1.68E-06
chr16	69943063	-4.941074419	1.68E-06
chr5	176808735	4.941013467	1.68E-06
chr4	42160511	-4.940167756	1.69E-06
chr4	41327147	-4.939114442	1.70E-06
chr11	19429091	-4.938456127	1.70E-06
chr9	13123175	-4.938388585	1.70E-06
chr13	21129987	-4.938102172	1.70E-06
chr1	16929957	-4.938052014	1.70E-06
chr21	43485567	-4.938014823	1.70E-06
chr20	46601990	-4.936592855	1.71E-06
chr4	887607	-4.93657473	1.71E-06
chr21	28212612	-4.93624078	1.72E-06
chr6	3469161	-4.935803751	1.72E-06
chr7	3959742	-4.93580122	1.72E-06
chr22	39654318	-4.934647725	1.73E-06
chr1	236267536	4.934109566	1.73E-06
chr1	110425362	-4.933912895	1.74E-06
chr17	90357	-4.933018075	1.74E-06
chr13	24664609	-4.932477159	1.75E-06
chr10	133875184	-4.932265366	1.75E-06
chr5	172997906	4.93079336	1.76E-06
chr2	240131764	-4.930609927	1.76E-06
chr1	6161187	-4.930604942	1.76E-06
chr3	15205252	-4.930532748	1.76E-06
chr10	128599247	-4.930336925	1.76E-06
chr1	34835446	-4.929441723	1.77E-06
chr11	93240046	-4.927993875	1.78E-06
chr9	74579816	-4.927800188	1.78E-06
chr4	38566355	-4.92751703	1.79E-06
chr7	640816	4.92685837	1.79E-06
chr7	36640139	-4.926802395	1.79E-06
chr7	62581925	4.926616766	1.79E-06
chr3	23704106	-4.925441212	1.80E-06
chr1	26597624	-4.924682714	1.81E-06
chr5	137057918	-4.9246241	1.81E-06
chr10	134387534	4.924612256	1.81E-06
chr20	18730542	-4.924072211	1.81E-06
chr1	203110833	-4.923835046	1.82E-06
chr9	29463227	4.923494437	1.82E-06
chr10	64573256	4.923366671	1.82E-06
chr3	23704166	-4.923249634	1.82E-06
chr5	914598	-4.923125967	1.82E-06
chr8	56037853	4.922684992	1.83E-06
chr12	115576201	-4.92210521	1.83E-06
chr8	140981416	-4.921205684	1.84E-06
chr16	664436	4.921139988	1.84E-06
chr6	116155835	-4.920974134	1.84E-06
chr2	47285930	-4.920935754	1.84E-06
chr1	249142716	-4.920775563	1.84E-06
chr16	66758895	4.920305783	1.85E-06
chr12	128674864	-4.919062626	1.86E-06
chr2	239097697	-4.916483227	1.88E-06
chr8	145846225	-4.916056461	1.88E-06
chr17	80651529	-4.91501193	1.89E-06
chr9	74579810	-4.914856281	1.89E-06
chr1	6161189	-4.914273176	1.90E-06
chr12	125460452	-4.913935975	1.90E-06
chr3	171674422	-4.913563802	1.90E-06
chr7	640820	4.91334675	1.91E-06
chr6	119632137	4.91324353	1.91E-06
chr2	26706481	-4.912868254	1.91E-06
chr8	1959503	-4.911916817	1.92E-06
chr19	22799664	-4.911773046	1.92E-06
chr10	1233226	-4.911446011	1.92E-06
chr3	197405899	-4.911229683	1.92E-06
chr11	123908913	-4.911149604	1.92E-06
chr19	42915961	-4.910050729	1.93E-06
chr9	13123158	-4.909769525	1.94E-06
chr3	195314139	-4.909444617	1.94E-06
chr4	144169974	-4.909406635	1.94E-06
chr7	150837941	-4.908872716	1.94E-06
chr9	137164395	-4.907594437	1.96E-06
chr2	120150550	-4.907548648	1.96E-06
chr2	79204355	-4.906982972	1.96E-06
chr13	41139110	-4.906539666	1.97E-06
chr9	109383987	-4.906050044	1.97E-06
chr3	71021701	-4.904492837	1.98E-06
chr1	21756757	-4.904376785	1.98E-06
chr2	113640402	-4.904348326	1.98E-06
chr18	72983868	-4.903996424	1.99E-06
chr10	129010769	-4.903162597	2.00E-06
chr1	43817267	-4.9025825	2.00E-06
chr10	43724449	4.902227655	2.00E-06
chr10	1237044	-4.901703735	2.01E-06
chr10	131560997	-4.90155732	2.01E-06
chr10	128155917	-4.901098813	2.01E-06
chr22	38382007	-4.900715723	2.02E-06
chr9	109383982	-4.900693523	2.02E-06
chr3	147130474	4.900547732	2.02E-06
chr18	13624449	-4.900061858	2.02E-06
chr6	156874115	-4.899929741	2.02E-06
chr9	109383965	-4.899743404	2.03E-06
chr9	84179975	-4.899597559	2.03E-06
chr11	34196536	-4.898924887	2.03E-06
chr22	38381998	-4.898536395	2.04E-06
chr11	721736	-4.898431989	2.04E-06
chr6	63873856	-4.898228436	2.04E-06
chr16	2103286	-4.898205102	2.04E-06
chr1	114431454	4.897698682	2.05E-06
chr11	7282945	-4.897033116	2.05E-06
chr6	169636888	-4.896882894	2.05E-06
chr5	17499680	4.896731494	2.05E-06
chr5	53846539	-4.8966265	2.06E-06
chr17	77402721	4.896303962	2.06E-06
chr17	77402724	4.896154918	2.06E-06
chr16	48489265	4.894425208	2.08E-06
chr4	6726964	-4.893955309	2.08E-06
chr9	110665868	-4.893876146	2.08E-06
chr18	71797602	-4.893487162	2.08E-06
chr18	72228165	4.893126151	2.09E-06
chr10	124964427	-4.892965657	2.09E-06
chr4	54182168	-4.892873073	2.09E-06
chr8	10166913	-4.892629429	2.09E-06
chr8	24770371	4.892228774	2.10E-06
chr1	205215183	-4.892163445	2.10E-06
chr1	120263834	-4.892153813	2.10E-06
chr3	126552419	-4.891910303	2.10E-06
chr9	29463270	4.891569235	2.10E-06
chr13	24200926	-4.891240163	2.11E-06
chr10	128599201	-4.890504747	2.11E-06
chr6	119632152	4.890491287	2.11E-06
chr17	10710085	-4.890470049	2.11E-06
chr8	141076539	-4.890351821	2.11E-06
chr2	240642567	-4.889115512	2.13E-06
chr19	20797167	-4.88859364	2.13E-06
chr18	76150590	-4.888367308	2.13E-06
chr10	118176666	-4.887358866	2.14E-06
chr10	129010789	-4.886758799	2.15E-06
chr21	43583879	-4.886677526	2.15E-06
chr1	110425357	-4.886305565	2.15E-06
chr11	61526465	-4.886207901	2.15E-06
chr4	31140202	-4.886126559	2.16E-06
chr7	13935595	-4.885873966	2.16E-06
chr7	43917247	-4.885786462	2.16E-06
chr4	629283	-4.88539952	2.16E-06
chr2	236885794	-4.8853511	2.16E-06
chr17	90351	-4.88528425	2.16E-06
chr5	3311508	-4.885026624	2.17E-06
chr1	114892574	-4.884767495	2.17E-06
chr15	92611408	-4.884729169	2.17E-06
chr13	24664624	-4.884166566	2.17E-06
chr11	1776688	-4.88414765	2.17E-06
chr1	160850448	-4.883076967	2.19E-06
chr5	82043265	-4.882774307	2.19E-06
chr10	101076114	-4.881968405	2.20E-06
chr14	94920047	4.881932217	2.20E-06
chr17	72314380	-4.881221837	2.20E-06
chr14	102413082	-4.880684349	2.21E-06
chr9	132665066	-4.879849894	2.22E-06
chr3	193535262	-4.879402376	2.22E-06
chr4	7315903	-4.879356094	2.22E-06
chr16	33949459	-4.878898935	2.23E-06
chr8	25242875	-4.878515328	2.23E-06
chr7	63225560	-4.878493068	2.23E-06
chr3	100057990	-4.877792893	2.24E-06
chr20	45603824	-4.877165875	2.24E-06
chr16	19621261	-4.876878583	2.25E-06
chr9	98224090	-4.87657326	2.25E-06
chr5	914619	-4.876056199	2.26E-06
chr17	62659411	-4.874414724	2.27E-06
chr9	107571746	-4.87416587	2.27E-06
chr18	12301562	-4.873626476	2.28E-06
chr5	24521635	4.873430961	2.28E-06
chr1	2886590	-4.873130454	2.29E-06
chr22	45401469	-4.872966102	2.29E-06
chr9	109362913	-4.872382591	2.29E-06
chr16	27642509	-4.871997989	2.30E-06
chr5	1475888	-4.871956855	2.30E-06
chr11	64739739	4.871412561	2.30E-06
chr20	54319214	-4.870735834	2.31E-06
chr3	170938029	-4.870560612	2.31E-06
chr7	144270888	4.870462317	2.31E-06
chr1	4804116	-4.87043926	2.31E-06
chr4	74583772	-4.868813013	2.33E-06
chr16	85327012	-4.867818385	2.34E-06
chr4	76971808	-4.867508373	2.34E-06
chr7	64270254	4.867249754	2.35E-06
chr10	124102759	-4.866630765	2.35E-06
chr1	120263814	-4.866579027	2.35E-06
chr2	241633152	-4.866377091	2.36E-06
chr16	51270058	-4.866141439	2.36E-06
chr5	32545395	-4.865607303	2.36E-06
chr10	98176121	-4.865192278	2.37E-06
chr10	134505251	4.864610314	2.37E-06
chr20	45603836	-4.86431595	2.38E-06
chr17	4400801	-4.864241618	2.38E-06
chr1	27775691	-4.863881667	2.38E-06
chr2	45029307	4.863526108	2.39E-06
chr14	37053424	4.863418388	2.39E-06
chr3	159778268	-4.862706362	2.40E-06
chr14	37053429	4.862210773	2.40E-06
chr9	6567194	-4.86201944	2.40E-06
chr9	6567201	-4.861990724	2.40E-06
chr4	6726899	-4.861532693	2.41E-06
chr1	205021915	-4.861407161	2.41E-06
chr19	35589897	-4.861216521	2.41E-06
chr17	76455589	-4.86113731	2.41E-06
chr6	158241188	-4.859878299	2.43E-06
chr19	18870451	-4.859859835	2.43E-06
chr10	78973539	-4.859852982	2.43E-06
chr9	98903501	-4.859632669	2.43E-06
chr13	113404041	-4.85947716	2.43E-06
chr10	4872911	-4.859310085	2.43E-06
chr9	110463093	-4.859107883	2.43E-06
chr9	131022887	4.859069484	2.43E-06
chr12	804467	4.85900741	2.44E-06
chr19	42413244	-4.858989018	2.44E-06
chr3	126552379	-4.858873523	2.44E-06
chr5	8129712	-4.858652476	2.44E-06
chr9	37392377	-4.858475474	2.44E-06
chr8	143171483	-4.857683548	2.45E-06
chr2	48433642	-4.857121571	2.46E-06
chr5	169285281	-4.855866918	2.47E-06
chr19	35828414	-4.855742919	2.47E-06
chr4	41053652	-4.854994519	2.48E-06
chr3	62356704	4.854495935	2.49E-06
chr13	41139120	-4.854393013	2.49E-06
chr18	77959266	-4.854063592	2.49E-06
chr7	142983148	-4.854021633	2.49E-06
chr17	35291286	4.853762508	2.49E-06
chr6	2432258	-4.853431363	2.50E-06
chr1	849084	-4.853079417	2.50E-06
chr9	73110552	-4.852859756	2.50E-06
chr1	160056037	-4.852199058	2.51E-06
chr6	119632145	4.851226445	2.52E-06
chr1	145036819	4.85066813	2.53E-06
chr12	133384736	4.850357073	2.53E-06
chr3	57145086	-4.850203063	2.53E-06
chr13	67730336	-4.850129974	2.53E-06
chr3	58227882	-4.849970474	2.54E-06
chr6	117734902	4.849553562	2.54E-06
chr3	193535268	-4.84881506	2.55E-06
chr14	37053426	4.847971509	2.56E-06
chr10	2184228	-4.847854876	2.56E-06
chr19	54715298	-4.847817537	2.56E-06
chr10	20281971	-4.847789497	2.56E-06
chr16	29389525	4.847418475	2.57E-06
chr1	9361948	-4.8472092	2.57E-06
chr3	193535228	-4.846942741	2.57E-06
chr10	28971144	-4.84685621	2.57E-06
chr2	237624450	-4.846737696	2.57E-06
chr10	851572	-4.846538071	2.58E-06
chr17	32364577	-4.84614562	2.58E-06
chr15	84643709	4.845698382	2.59E-06
chr12	114329737	-4.845290396	2.59E-06
chr6	32117019	4.845228239	2.59E-06
chr1	9361992	-4.845145218	2.59E-06
chr2	228882758	-4.845133285	2.59E-06
chr1	160056006	-4.84452951	2.60E-06
chr2	74753281	-4.844397938	2.60E-06
chr2	235901349	-4.844174427	2.60E-06
chr16	2103319	-4.844110651	2.60E-06
chr11	113803579	4.843954285	2.61E-06
chr10	129013230	-4.842889739	2.62E-06
chr5	174157230	4.84265156	2.62E-06
chr20	35752070	-4.841721591	2.63E-06
chr19	47882830	-4.841593482	2.63E-06
chr13	101289878	-4.841008356	2.64E-06
chr10	131561011	-4.840922649	2.64E-06
chr5	55950261	-4.840766732	2.64E-06
chr2	135381987	-4.839705211	2.66E-06
chr8	28975143	-4.839184107	2.66E-06
chr13	114757928	-4.838660183	2.67E-06
chr20	18730556	-4.838515621	2.67E-06
chr17	18411182	-4.838047816	2.68E-06
chr11	95253890	-4.837268418	2.69E-06
chr17	47624051	-4.836480627	2.69E-06
chr17	70379407	-4.836264227	2.70E-06
chr8	94786500	4.83607739	2.70E-06
chr22	47362135	-4.835186262	2.71E-06
chr1	4832549	4.835146567	2.71E-06
chr4	74810352	4.834993654	2.71E-06
chr2	228882762	-4.834983426	2.71E-06
chr19	47882810	-4.834913759	2.71E-06
chr19	19018153	-4.834578708	2.72E-06
chr8	141292066	-4.834513124	2.72E-06
chr11	65366610	-4.834145792	2.72E-06
chr2	218197772	-4.834087984	2.72E-06
chr13	109882296	4.833919212	2.73E-06
chr18	13624455	-4.833846773	2.73E-06
chr9	84179969	-4.833356904	2.73E-06
chr17	77402734	4.833235114	2.73E-06
chr17	60587494	-4.83302488	2.74E-06
chr2	47285891	-4.832993102	2.74E-06
chr14	105448252	-4.832960621	2.74E-06
chr12	804473	4.832070222	2.75E-06
chr1	222141704	-4.831925556	2.75E-06
chr16	67027726	-4.83192503	2.75E-06
chr7	47866928	-4.831895905	2.75E-06
chr3	5470091	4.831698863	2.75E-06
chr2	138944922	-4.831502177	2.76E-06
chr7	130783020	-4.830952889	2.76E-06
chr4	184922069	-4.830741199	2.76E-06
chr10	134553113	-4.830709998	2.77E-06
chr6	163786028	-4.830469354	2.77E-06
chr4	141275124	-4.829693556	2.78E-06
chr19	35828410	-4.828903084	2.79E-06
chr7	33028164	-4.828734241	2.79E-06
chr5	120442902	-4.82849409	2.79E-06
chr21	35765434	-4.828438551	2.79E-06
chr9	133946654	-4.827514376	2.81E-06
chr10	20281922	-4.827192625	2.81E-06
chr16	48489295	4.827098853	2.81E-06
chr18	12696433	4.826829858	2.81E-06
chr17	62659420	-4.826502354	2.82E-06
chr19	29991019	-4.82614464	2.82E-06
chr10	63812558	-4.825973824	2.82E-06
chr7	148123668	-4.825887442	2.83E-06
chr5	55248572	-4.825546717	2.83E-06
chr7	640809	4.823948223	2.85E-06
chr6	134946628	-4.823064641	2.86E-06
chr13	67730391	-4.822919612	2.86E-06
chr14	91043761	-4.822889252	2.86E-06
chr6	169636868	-4.822078357	2.87E-06
chr11	64420204	-4.821833942	2.88E-06
chr20	56007045	-4.82174745	2.88E-06
chr7	43917258	-4.821578971	2.88E-06
chr3	13462856	-4.821154533	2.89E-06
chr18	77268347	-4.820775002	2.89E-06
chr7	25227323	-4.820687431	2.89E-06
chr8	99384613	-4.820031574	2.90E-06
chr3	170171570	-4.819100485	2.91E-06
chr10	129096130	-4.818991878	2.91E-06
chr10	129010765	-4.818976692	2.91E-06
chr10	81084558	-4.818882158	2.92E-06
chr10	133875193	-4.818666706	2.92E-06
chr18	74631889	4.817458977	2.93E-06
chr6	3353140	-4.816959437	2.94E-06
chr10	134904914	-4.816022554	2.95E-06
chr4	2824738	-4.815106532	2.97E-06
chr1	18526130	-4.815097652	2.97E-06
chr5	65103519	-4.814375937	2.98E-06
chr10	133890195	-4.814210476	2.98E-06
chr11	64739716	4.814147787	2.98E-06
chr10	129111939	-4.814128659	2.98E-06
chr9	110665862	-4.813551314	2.99E-06
chr10	116761340	-4.813484264	2.99E-06
chr8	141076529	-4.812960452	2.99E-06
chr3	171674417	-4.812839566	3.00E-06
chr16	85962502	-4.810872448	3.02E-06
chr14	89532891	4.810647953	3.02E-06
chr2	8571352	-4.810377288	3.03E-06
chr16	12602861	-4.810159149	3.03E-06
chr5	55950244	-4.810155002	3.03E-06
chr22	38508233	-4.810014627	3.03E-06
chr10	62199157	-4.809776937	3.04E-06
chr5	3311496	-4.80970752	3.04E-06
chr19	63344	-4.809256059	3.04E-06
chr19	19018134	-4.809016156	3.05E-06
chr18	77268343	-4.808806146	3.05E-06
chr2	105317438	-4.808585233	3.05E-06
chr19	2301595	-4.80851984	3.05E-06
chr20	34645763	4.808087498	3.06E-06
chr7	66130903	-4.80763126	3.07E-06
chr19	16716944	-4.807380348	3.07E-06
chr9	139249463	-4.807214231	3.07E-06
chr12	51126802	-4.806813339	3.08E-06
chr20	48009101	4.806622075	3.08E-06
chr1	95783797	-4.806605552	3.08E-06
chr17	990651	4.806089368	3.09E-06
chr10	30060717	4.805728444	3.09E-06
chr4	185023898	-4.805180406	3.10E-06
chr12	751141	-4.804795556	3.11E-06
chr12	4406979	4.804778051	3.11E-06
chr2	236551812	-4.803666358	3.12E-06
chr10	129096140	-4.803660319	3.12E-06
chr14	75412888	-4.803412771	3.12E-06
chr9	92000060	-4.802922755	3.13E-06
chr8	94786538	4.802778246	3.13E-06
chr12	12633218	-4.802593217	3.14E-06
chr19	58094747	4.802288019	3.14E-06
chr4	16817610	4.801824312	3.15E-06
chr3	63976432	-4.801788836	3.15E-06
chr5	17596889	4.80176607	3.15E-06
chr6	170552540	-4.801444996	3.15E-06
chr15	51642696	-4.80115162	3.16E-06
chr18	55106590	4.801065498	3.16E-06
chr5	42887482	-4.800073989	3.17E-06
chr19	578239	4.799793873	3.18E-06
chr7	36640149	-4.799652027	3.18E-06
chr11	33712223	-4.79915175	3.18E-06
chr20	36954722	-4.799056057	3.19E-06
chr3	159778320	-4.79892748	3.19E-06
chr15	63052300	-4.798352659	3.20E-06
chr1	203137611	-4.797717943	3.20E-06
chr3	137591737	-4.797550278	3.21E-06
chr1	2391121	-4.797472813	3.21E-06
chr6	170552491	-4.797383203	3.21E-06
chr9	6567208	-4.797355509	3.21E-06
chr16	48489232	4.797337511	3.21E-06
chr22	38096042	-4.797302	3.21E-06
chr5	55950263	-4.7969111	3.22E-06
chr17	55948689	-4.796014068	3.23E-06
chr5	17596917	4.795922355	3.23E-06
chr16	57087285	4.795507081	3.24E-06
chr2	169025365	-4.795352798	3.24E-06
chr13	24200941	-4.795238777	3.24E-06
chr12	109797277	-4.793925775	3.26E-06
chr20	3378108	-4.793026933	3.27E-06
chr6	6598110	4.791900118	3.29E-06
chr1	204959141	-4.791508077	3.29E-06
chr5	139038827	-4.791318276	3.30E-06
chr13	49878670	-4.790525705	3.31E-06
chr9	137164356	-4.790524415	3.31E-06
chr10	128291865	-4.790230876	3.31E-06
chr18	6074131	-4.78957392	3.32E-06
chr7	155962486	-4.789496829	3.32E-06
chr20	17607293	-4.789035771	3.33E-06
chr16	12602850	-4.787944948	3.35E-06
chr9	7346369	-4.787685271	3.35E-06
chr11	113803567	4.787548984	3.35E-06
chr13	113940404	-4.787277617	3.36E-06
chr1	39035982	-4.787271409	3.36E-06
chr3	48460214	-4.786937374	3.36E-06
chr1	16929991	-4.786722706	3.37E-06
chr16	907583	4.786417723	3.37E-06
chr8	143397619	-4.786027997	3.38E-06
chr10	134553108	-4.785711345	3.38E-06
chr21	43400195	4.785624263	3.38E-06
chr5	137183564	-4.785507361	3.38E-06
chr2	113640376	-4.785472901	3.38E-06
chr2	47218306	-4.783758734	3.41E-06
chr10	122896192	-4.783544163	3.41E-06
chr8	29026133	-4.783466185	3.41E-06
chr1	156263821	4.782157931	3.43E-06
chr18	72983899	-4.782019475	3.44E-06
chr2	48426524	-4.781901162	3.44E-06
chr18	74631905	4.781693072	3.44E-06
chr16	84271391	-4.781681115	3.44E-06
chr10	81151798	-4.781519863	3.44E-06
chr21	47330674	-4.780570097	3.46E-06
chr11	130238313	-4.780518939	3.46E-06
chr3	107306498	-4.780396293	3.46E-06
chr14	103777774	-4.780345985	3.46E-06
chr17	76455557	-4.779573508	3.47E-06
chr11	64739728	4.779463753	3.48E-06
chr12	112614036	-4.779375038	3.48E-06
chr16	67027730	-4.778990614	3.48E-06
chr7	111788966	-4.778695976	3.49E-06
chr8	102118677	-4.778612193	3.49E-06
chr3	57145095	-4.778276612	3.49E-06
chr1	32200038	-4.777755417	3.50E-06
chr4	659482	-4.777688419	3.50E-06
chr15	45364596	-4.777564816	3.51E-06
chr16	85193803	-4.777357948	3.51E-06
chr22	20505496	4.77730295	3.51E-06
chr3	43907493	-4.777289399	3.51E-06
chr19	3196330	-4.777098846	3.51E-06
chr6	163786022	-4.776664845	3.52E-06
chr1	84200211	-4.776072376	3.53E-06
chr1	93331751	-4.775621614	3.54E-06
chr18	57570287	-4.775602663	3.54E-06
chr22	38510218	-4.775478324	3.54E-06
chr10	6573960	-4.775285405	3.54E-06
chr11	2902415	-4.775228981	3.54E-06
chr10	134904812	-4.774906405	3.55E-06
chr16	85682690	-4.774765053	3.55E-06
chr6	134946569	-4.774698756	3.55E-06
chr16	33949486	-4.774626655	3.55E-06
chr15	102270774	-4.774414488	3.55E-06
chr2	138944955	-4.774389458	3.56E-06
chr5	176987008	-4.774165496	3.56E-06
chr17	76197009	-4.774034522	3.56E-06
chr21	46370434	-4.773853143	3.56E-06
chr4	154096540	-4.773530828	3.57E-06
chr3	52412353	-4.772985125	3.58E-06
chr1	3638592	-4.772814153	3.58E-06
chr20	52076235	4.772785888	3.58E-06
chr11	76914316	-4.772755469	3.58E-06
chr9	37392372	-4.77256169	3.58E-06
chr5	3194912	4.772365847	3.59E-06
chr17	70657620	-4.772304518	3.59E-06
chr5	9691121	-4.772174242	3.59E-06
chr7	153901670	-4.772026276	3.59E-06
chr17	4400815	-4.77172734	3.60E-06
chr10	128205208	-4.770841981	3.61E-06
chr6	163821004	-4.770291413	3.62E-06
chr12	132924490	-4.769757869	3.63E-06
chr2	127016243	4.769701619	3.63E-06
chr16	86029944	-4.769381802	3.64E-06
chr6	157787368	-4.768914968	3.64E-06
chr4	31140189	-4.7687073	3.65E-06
chr17	32364587	-4.768676556	3.65E-06
chr5	43522331	4.768234202	3.65E-06
chr16	69943052	-4.768223039	3.65E-06
chr2	20890642	-4.767981879	3.66E-06
chr3	133594750	-4.767513163	3.67E-06
chr22	30951823	4.766925312	3.67E-06
chr10	134505244	4.766603838	3.68E-06
chr11	7282965	-4.766574921	3.68E-06
chr2	240406869	-4.76643879	3.68E-06
chr10	81084528	-4.766361098	3.68E-06
chr8	3890512	-4.766190762	3.69E-06
chr6	2432276	-4.765775065	3.69E-06
chr20	62373423	-4.765220632	3.70E-06
chr14	56523527	-4.765169712	3.70E-06
chr4	154096637	-4.764758418	3.71E-06
chr12	94964696	-4.764748325	3.71E-06
chr10	665316	-4.764472125	3.72E-06
chr16	29320220	-4.764363657	3.72E-06
chr16	51270070	-4.764318741	3.72E-06
chr8	141076470	-4.763745624	3.73E-06
chr12	12633209	-4.763692142	3.73E-06
chr19	35807758	-4.763175083	3.74E-06
chr1	175464158	-4.762707524	3.74E-06
chr8	141292050	-4.762412747	3.75E-06
chr15	89234275	-4.762396137	3.75E-06
chr8	27443137	-4.761758134	3.76E-06
chr2	236758482	-4.761144163	3.77E-06
chr4	887609	-4.760456001	3.78E-06
chr3	197769126	-4.760442151	3.78E-06
chr4	141207908	4.760157716	3.79E-06
chr1	114892570	-4.759996672	3.79E-06
chr2	240902821	-4.75994753	3.79E-06
chr21	48017896	-4.759802765	3.79E-06
chr1	229387943	-4.759681068	3.79E-06
chr1	39035964	-4.759587654	3.80E-06
chr10	94451992	4.759551041	3.80E-06
chr17	8794671	-4.759403323	3.80E-06
chr2	239033825	-4.759319782	3.80E-06
chr3	19405793	-4.759005088	3.81E-06
chr2	233528413	-4.759004015	3.81E-06
chr6	137666907	-4.758425359	3.82E-06
chr10	2393908	-4.758387453	3.82E-06
chr1	116589207	-4.758189115	3.82E-06
chr20	17607296	-4.757982751	3.82E-06
chr9	139249460	-4.757114799	3.84E-06
chr10	81084551	-4.756842275	3.84E-06
chr7	63225567	-4.756802696	3.84E-06
chr4	49310758	4.756267825	3.85E-06
chr5	80549329	-4.756231177	3.85E-06
chr8	56037876	4.756058197	3.86E-06
chr6	162720271	-4.756034845	3.86E-06
chr7	38412800	-4.755460626	3.87E-06
chr16	437177	-4.754829494	3.88E-06
chr17	48921904	-4.754509345	3.88E-06
chr6	102695810	-4.754435845	3.88E-06
chr10	118176755	-4.754272727	3.89E-06
chr6	163656189	-4.754189532	3.89E-06
chr4	12604633	4.754020144	3.89E-06
chr10	103530352	4.753375481	3.90E-06
chr6	168449093	-4.753181529	3.91E-06
chr18	12696450	4.753152483	3.91E-06
chr4	156082862	-4.753019614	3.91E-06
chr10	22945485	-4.752790659	3.91E-06
chr17	48612060	-4.752255036	3.92E-06
chr4	6726970	-4.752103433	3.92E-06
chr1	40236306	4.751130749	3.94E-06
chr6	1603884	4.750984194	3.94E-06
chr8	3890485	-4.750899791	3.95E-06
chr10	101076097	-4.750625155	3.95E-06
chr17	77402682	4.750543411	3.95E-06
chr1	114431462	4.750027559	3.96E-06
chr6	169192710	-4.749635023	3.97E-06
chr8	29064939	-4.749467368	3.97E-06
chr2	241074385	-4.749277156	3.97E-06
chr13	67730399	-4.748822503	3.98E-06
chr13	24664620	-4.748435171	3.99E-06
chr4	79429986	-4.747920929	4.00E-06
chr10	4872921	-4.747810973	4.00E-06
chr10	128310581	-4.747802403	4.00E-06
chr6	41443297	-4.747604559	4.00E-06
chr14	73147265	-4.747304056	4.01E-06
chr19	1389497	-4.747216661	4.01E-06
chr10	118176739	-4.747066457	4.01E-06
chr1	205021910	-4.746629824	4.02E-06
chr9	37392343	-4.746550622	4.02E-06
chr10	126298467	-4.746465111	4.02E-06
chr1	204959146	-4.745874391	4.03E-06
chr17	42865131	-4.74587364	4.03E-06
chr2	241633132	-4.745725327	4.04E-06
chr1	9356246	-4.745199365	4.05E-06
chr1	114431445	4.744758933	4.05E-06
chr1	1164178	-4.744490679	4.06E-06
chr13	49881553	-4.744462363	4.06E-06
chr8	121066278	-4.744397988	4.06E-06
chr14	23636736	4.744339548	4.06E-06
chr14	36467202	-4.744009036	4.07E-06
chr13	36304863	-4.743546742	4.08E-06
chr10	101076120	-4.743350443	4.08E-06
chr16	85962508	-4.743291213	4.08E-06
chr14	34326066	-4.743063438	4.08E-06
chr19	35589890	-4.743050516	4.08E-06
chr18	71797596	-4.742403375	4.10E-06
chr7	123800177	-4.742388233	4.10E-06
chr4	6964539	-4.741542282	4.11E-06
chr1	39035954	-4.741349798	4.12E-06
chr17	39875045	-4.741290806	4.12E-06
chr20	55677857	-4.741165091	4.12E-06
chr16	69177292	-4.741052402	4.12E-06
chr13	113404760	-4.740876848	4.12E-06
chr13	66923923	-4.740820194	4.13E-06
chr17	76113184	-4.740557509	4.13E-06
chr2	236975041	-4.739636982	4.15E-06
chr10	1307918	4.739536964	4.15E-06
chr11	18512450	-4.739416694	4.15E-06
chr12	81272378	-4.739139824	4.16E-06
chr18	23318436	-4.738847624	4.16E-06
chr10	128949930	-4.738645171	4.17E-06
chr6	3469128	-4.738345	4.17E-06
chr19	51073329	-4.738212209	4.17E-06
chr8	38176892	-4.738212151	4.17E-06
chr8	142732632	-4.738077703	4.18E-06
chr7	152999493	-4.737964021	4.18E-06
chr10	43724478	4.737889705	4.18E-06
chr16	27642469	-4.737882763	4.18E-06
chr9	7346375	-4.737521908	4.19E-06
chr1	39035993	-4.737506178	4.19E-06
chr16	32051318	-4.737052351	4.19E-06
chr1	116526235	-4.736570681	4.20E-06
chr16	85260228	-4.736561372	4.20E-06
chr4	141275132	-4.736320579	4.21E-06
chr10	129111944	-4.736191827	4.21E-06
chr1	153196241	-4.736142498	4.21E-06
chr1	248520904	-4.736069289	4.21E-06
chr14	77731525	-4.735664353	4.22E-06
chr6	155454967	4.735570517	4.22E-06
chr10	123369520	-4.735369538	4.23E-06
chr1	228096706	-4.735049138	4.23E-06
chr13	111903503	-4.734904868	4.23E-06
chr10	134505287	4.734543135	4.24E-06
chr16	74444238	-4.734426263	4.24E-06
chr20	55876652	-4.734146748	4.25E-06
chr4	141275158	-4.733901455	4.25E-06
chr7	130782978	-4.733836071	4.25E-06
chr6	119632156	4.733428562	4.26E-06
chr8	139590173	-4.733369521	4.26E-06
chr2	236978720	-4.733195269	4.27E-06
chr2	233506032	-4.733118718	4.27E-06
chr8	37401028	-4.733052768	4.27E-06
chr10	124102731	-4.732369042	4.28E-06
chr1	4589762	-4.732356168	4.28E-06
chr10	122896124	-4.731917208	4.29E-06
chr1	50890359	4.731865889	4.29E-06
chr14	101096371	-4.731648118	4.30E-06
chr11	112915632	4.730757527	4.31E-06
chr13	113404109	-4.730528122	4.32E-06
chr21	28363481	-4.730405068	4.32E-06
chr5	167645245	-4.729749853	4.33E-06
chr8	51186749	4.729719208	4.33E-06
chr16	27317611	4.729597561	4.33E-06
chr17	76113492	-4.72904493	4.35E-06
chr17	2737346	4.728890306	4.35E-06
chr19	35790200	-4.728711962	4.35E-06
chr6	2191029	-4.728501095	4.36E-06
chr10	73571240	-4.728462276	4.36E-06
chr1	50890365	4.727836479	4.37E-06
chr7	130418211	4.727631652	4.37E-06
chr19	8431194	-4.727530853	4.37E-06
chr19	18870443	-4.727529636	4.37E-06
chr7	111788979	-4.72709844	4.38E-06
chr17	43829054	-4.727042125	4.38E-06
chr2	104832266	-4.726802483	4.39E-06
chr22	50854654	-4.726713803	4.39E-06
chr21	29752784	-4.726242637	4.40E-06
chr3	137591733	-4.726203598	4.40E-06
chr7	45003267	-4.726156589	4.40E-06
chr16	19154719	-4.725993218	4.40E-06
chr10	116761330	-4.725983178	4.40E-06
chr4	659466	-4.725964532	4.41E-06
chr3	195314134	-4.7259007	4.41E-06
chr2	242799843	-4.72574311	4.41E-06
chr5	74094936	-4.725024269	4.42E-06
chr17	37245960	4.724662786	4.43E-06
chr1	50890354	4.724221323	4.44E-06
chr6	36733087	-4.723139748	4.46E-06
chr4	184922075	-4.72299238	4.46E-06
chr1	101822245	4.722977318	4.46E-06
chr2	45164720	4.722849583	4.47E-06
chr11	7283000	-4.722018716	4.48E-06
chr7	73443563	-4.721901014	4.48E-06
chr16	74444247	-4.721708577	4.49E-06
chr9	110665899	-4.721337098	4.50E-06
chr21	43485543	-4.721201908	4.50E-06
chr15	89530577	4.721078238	4.50E-06
chr3	69292037	-4.721036815	4.50E-06
chr2	240131758	-4.720746386	4.51E-06
chr1	237580478	-4.720304608	4.52E-06
chr10	22912474	-4.720128088	4.52E-06
chr19	4504754	-4.719889516	4.52E-06
chr9	6567234	-4.719854505	4.53E-06
chr9	74579828	-4.719817987	4.53E-06
chr8	2210158	-4.719139924	4.54E-06
chr19	39568007	-4.719049265	4.54E-06
chr2	242436088	-4.719042129	4.54E-06
chr16	29443290	4.718854733	4.55E-06
chr3	58227864	-4.718609832	4.55E-06
chr20	1877744	-4.717779174	4.57E-06
chr10	120172628	-4.717774047	4.57E-06
chr22	30951848	4.717436964	4.57E-06
chr5	17596861	4.717337274	4.58E-06
chr6	102695801	-4.717275178	4.58E-06
chr11	120429071	-4.71724022	4.58E-06
chr12	110296488	-4.716981167	4.58E-06
chr4	629243	-4.716979675	4.58E-06
chr11	17799437	4.716930124	4.58E-06
chr14	95947301	-4.716779622	4.59E-06
chr1	149428223	4.716249575	4.60E-06
chr9	117111889	-4.715746224	4.61E-06
chr6	63450572	-4.715612924	4.61E-06
chr9	133946623	-4.715425175	4.61E-06
chr1	3090136	-4.715371683	4.62E-06
chr1	44878382	-4.715015453	4.62E-06
chr5	80549304	-4.714706312	4.63E-06
chr10	118763062	-4.714277153	4.64E-06
chr8	139767361	4.714110026	4.64E-06
chr4	31140174	-4.71378745	4.65E-06
chr13	82841727	4.713773077	4.65E-06
chr10	129010755	-4.71375296	4.65E-06
chr11	112915629	4.713676484	4.65E-06
chr3	100057992	-4.713488699	4.65E-06
chr10	103530370	4.713356589	4.66E-06
chr6	163661553	-4.713151649	4.66E-06
chr1	204959154	-4.713080209	4.66E-06
chr1	205215178	-4.712984753	4.66E-06
chr7	13935606	-4.712739782	4.67E-06
chr1	203489120	-4.712349347	4.68E-06
chr12	109675039	4.71224043	4.68E-06
chr6	3469155	-4.712070593	4.68E-06
chr10	44321993	4.71204095	4.68E-06
chr6	156874105	-4.711888576	4.69E-06
chr5	74094908	-4.71145137	4.70E-06
chr18	32572836	-4.711386213	4.70E-06
chr10	99300086	-4.711121772	4.70E-06
chr2	241633189	-4.710684065	4.71E-06
chr20	35752091	-4.710372336	4.72E-06
chr1	229387931	-4.710230875	4.72E-06
chr3	57145043	-4.710204665	4.72E-06
chr13	47862983	-4.710187855	4.72E-06
chr8	18473666	-4.709869811	4.73E-06
chr1	50890350	4.709788226	4.73E-06
chr17	48056721	-4.709676451	4.73E-06
chr17	19555084	-4.709586007	4.73E-06
chr4	83916931	-4.709458926	4.74E-06
chr8	29026113	-4.709123245	4.74E-06
chr11	70483052	-4.70910399	4.74E-06
chr7	150837934	-4.709097049	4.74E-06
chr15	31496150	-4.709028497	4.75E-06
chr10	73038524	-4.708851634	4.75E-06
chr12	804487	4.708291553	4.76E-06
chr5	82043256	-4.708248264	4.76E-06
chr9	117941054	4.708091031	4.77E-06
chr20	5157402	-4.707768469	4.77E-06
chr18	33931331	4.70742501	4.78E-06
chr5	24521652	4.70710523	4.79E-06
chr22	39654282	-4.706808989	4.79E-06
chr1	210804295	-4.70669458	4.80E-06
chr17	76197017	-4.706672222	4.80E-06
chr3	107761392	-4.706631362	4.80E-06
chr1	31239327	-4.706130435	4.81E-06
chr1	25895219	-4.705258677	4.83E-06
chr16	50718769	-4.704922134	4.83E-06
chr8	38352879	-4.704836363	4.83E-06
chr10	99942438	-4.704770872	4.84E-06
chr11	64420231	-4.704673218	4.84E-06
chr14	59055387	-4.704553786	4.84E-06
chr6	239280	-4.704193616	4.85E-06
chr17	59668312	-4.704169221	4.85E-06
chr3	137591716	-4.704151021	4.85E-06
chr1	220894601	-4.704059075	4.85E-06
chr8	102118688	-4.703855099	4.86E-06
chr6	21662019	4.703327818	4.87E-06
chr6	169407942	-4.702784469	4.88E-06
chr19	31118732	-4.702709582	4.88E-06
chr10	81173218	-4.702565751	4.88E-06
chr4	539003	4.702531709	4.88E-06
chr19	2301592	-4.702384994	4.89E-06
chr4	186791450	-4.702301797	4.89E-06
chr2	127433250	-4.702240894	4.89E-06
chr12	68549155	-4.702201987	4.89E-06
chr15	42699344	-4.70204748	4.89E-06
chr5	169285269	-4.701361201	4.91E-06
chr10	128261758	-4.70122527	4.91E-06
chr21	32701667	4.700417382	4.93E-06
chr2	175537405	-4.69999987	4.94E-06
chr2	46565599	-4.699864578	4.94E-06
chr8	65292373	4.699810725	4.94E-06
chr16	29320258	-4.699444105	4.95E-06
chr17	33457404	4.69900655	4.96E-06
chr1	2886557	-4.697350653	5.00E-06
chr1	202062996	-4.6973327	5.00E-06
chr7	640830	4.69732068	5.00E-06
chr16	33949489	-4.697174345	5.00E-06
chr11	118498803	-4.696688082	5.01E-06
chr1	234930087	-4.696551513	5.01E-06
chr18	23318434	-4.696536158	5.01E-06
chr9	133946664	-4.69647118	5.02E-06
chr19	4504741	-4.696187626	5.02E-06
chr10	129096125	-4.696099759	5.02E-06
chr16	29315897	-4.695791827	5.03E-06
chr8	29026105	-4.695586859	5.03E-06
chr5	120442939	-4.695499103	5.04E-06
chr9	6730813	-4.695073424	5.05E-06
chr13	67730386	-4.694741423	5.05E-06
chr3	43907499	-4.694526034	5.06E-06
chr7	66511160	-4.694032758	5.07E-06
chr6	63873860	-4.693933521	5.07E-06
chr13	66923903	-4.693847956	5.07E-06
chr2	236885836	-4.693712087	5.08E-06
chr5	17499710	4.693642479	5.08E-06
chr2	175537432	-4.693595377	5.08E-06
chr2	235917048	-4.693445413	5.08E-06
chr3	7649401	-4.69342113	5.08E-06
chr15	41219088	-4.693379951	5.08E-06
chr20	45603813	-4.6931886	5.09E-06
chr9	6730880	-4.692968702	5.09E-06
chr5	69497573	-4.692949238	5.09E-06
chr6	63873865	-4.692869977	5.10E-06
chr9	135798367	-4.692351973	5.11E-06
chr12	751167	-4.69216704	5.11E-06
chr10	128599229	-4.692110238	5.11E-06
chr10	128156158	-4.691918873	5.12E-06
chr9	123642209	-4.691773602	5.12E-06
chr1	204236636	-4.691485646	5.13E-06
chr5	174157220	4.691298862	5.13E-06
chr18	72122256	-4.691118341	5.13E-06
chr3	192538433	4.690761985	5.14E-06
chr2	217649833	-4.690575153	5.15E-06
chr2	240385709	-4.690045042	5.16E-06
chr7	62581906	4.689489496	5.17E-06
chr6	7541007	4.689373171	5.17E-06
chr18	10045895	-4.689298537	5.18E-06
chr17	18540639	4.689119093	5.18E-06
chr22	37168731	-4.688933263	5.18E-06
chr21	46370413	-4.688786284	5.19E-06
chr5	65528561	-4.687813229	5.21E-06
chr11	70483041	-4.687325325	5.22E-06
chr2	236551816	-4.687012184	5.23E-06
chr5	92367877	-4.686847916	5.23E-06
chr12	115576154	-4.68683016	5.23E-06
chr4	141521722	-4.686045897	5.25E-06
chr10	20281945	-4.686011962	5.25E-06
chr1	228096718	-4.685997764	5.25E-06
chr14	95727439	-4.68511352	5.27E-06
chr5	90634093	-4.684849845	5.28E-06
chr1	26881454	-4.684784816	5.28E-06
chr12	70230943	-4.684727315	5.28E-06
chr20	37525527	-4.68419717	5.29E-06
chr3	172416987	-4.683930376	5.30E-06
chr22	30951818	4.683605078	5.31E-06
chr3	172416982	-4.683131487	5.32E-06
chr5	80549277	-4.682789982	5.33E-06
chr10	665312	-4.682591733	5.33E-06
chr21	43764456	-4.682490591	5.33E-06
chr19	31118711	-4.681556391	5.35E-06
chr6	163608016	-4.68114762	5.36E-06
chr22	45401471	-4.681113445	5.36E-06
chr9	15177898	4.681102581	5.37E-06
chr1	26881463	-4.680664916	5.38E-06
chr1	50890343	4.680375828	5.38E-06
chr10	6573945	-4.680320386	5.38E-06
chr9	98813027	-4.680320241	5.38E-06
chr21	38137321	-4.680292224	5.38E-06
chr16	51270030	-4.680255498	5.38E-06
chr8	25245307	-4.680169853	5.39E-06
chr7	153901685	-4.680097006	5.39E-06
chr10	129056601	-4.679513127	5.40E-06
chr1	4804127	-4.679332203	5.41E-06
chr16	74760170	-4.679303455	5.41E-06
chr20	46602017	-4.679007145	5.41E-06
chr19	5141276	4.678979766	5.42E-06
chr6	39820296	-4.678868116	5.42E-06
chr21	44829625	4.678757767	5.42E-06
chr12	12633223	-4.67855466	5.43E-06
chr1	4811775	-4.678432014	5.43E-06
chr6	163662477	-4.678365048	5.43E-06
chr14	105210538	-4.678230782	5.43E-06
chr7	130782965	-4.67821136	5.43E-06
chr6	17820553	-4.678083888	5.44E-06
chr12	110296499	-4.677916828	5.44E-06
chr8	1782390	-4.677838584	5.44E-06
chr13	111903517	-4.677388743	5.45E-06
chr1	3340067	-4.677356976	5.45E-06
chr18	33931368	4.677236731	5.46E-06
chr3	33543195	-4.677195392	5.46E-06
chr3	15205271	-4.676238156	5.48E-06
chr17	37911394	4.676053989	5.48E-06
chr20	31905443	4.675516152	5.50E-06
chr2	127423703	-4.675293061	5.50E-06
chr4	6964556	-4.675199284	5.51E-06
chr17	27011690	-4.675104515	5.51E-06
chr5	24521608	4.674776881	5.52E-06
chr22	39134925	-4.674349854	5.53E-06
chr17	72222024	-4.674309381	5.53E-06
chr7	153378440	-4.67404552	5.53E-06
chr16	67027732	-4.674025469	5.53E-06
chr8	10166898	-4.67379075	5.54E-06
chr21	32701658	4.673656692	5.54E-06
chr8	143397582	-4.673572604	5.54E-06
chr8	141536503	-4.673530118	5.55E-06
chr17	35415686	-4.673243337	5.55E-06
chr4	182557841	4.672991682	5.56E-06
chr12	114329734	-4.672717395	5.57E-06
chr19	35828435	-4.672660673	5.57E-06
chr20	45763295	4.672415375	5.57E-06
chr20	18730490	-4.672247822	5.58E-06
chr16	15234847	-4.672207646	5.58E-06
chr2	218694872	-4.672082145	5.58E-06
chr13	113404093	-4.672031436	5.58E-06
chr15	51585711	-4.67197788	5.58E-06
chr18	74631891	4.671974368	5.58E-06
chr2	120150577	-4.671928492	5.58E-06
chr14	101312329	-4.671701749	5.59E-06
chr17	59668330	-4.671696402	5.59E-06
chr13	101289874	-4.670845738	5.61E-06
chr8	3890490	-4.670544472	5.62E-06
chr7	18606784	-4.669957454	5.63E-06
chr7	27980271	-4.669953963	5.63E-06
chr1	34859666	4.669871815	5.64E-06
chr5	135186131	-4.669681427	5.64E-06
chr8	86370828	-4.669673611	5.64E-06
chr11	63856659	-4.669595902	5.64E-06
chr7	75258582	-4.669155405	5.65E-06
chr22	34552064	4.669127016	5.65E-06
chr21	28363458	-4.668666512	5.67E-06
chr8	1782415	-4.668216716	5.68E-06
chr9	84179962	-4.66813339	5.68E-06
chr1	14826340	-4.667983909	5.68E-06
chr10	134552900	-4.667818425	5.69E-06
chr10	25104991	-4.667038836	5.71E-06
chr11	61609598	-4.666996479	5.71E-06
chr15	51642683	-4.666857389	5.71E-06
chr14	88769869	-4.666742059	5.71E-06
chr5	153761016	-4.666156066	5.73E-06
chr11	2919763	-4.666119455	5.73E-06
chr2	26706485	-4.665849409	5.74E-06
chr1	203110801	-4.665630612	5.74E-06
chr20	43347426	-4.665256697	5.75E-06
chr5	112403844	-4.665216154	5.75E-06
chr2	135381995	-4.66494246	5.76E-06
chr17	55934680	-4.664926031	5.76E-06
chr9	98903436	-4.664892927	5.76E-06
chr10	99300104	-4.664743402	5.76E-06
chr5	38483329	-4.664694391	5.76E-06
chr22	39654277	-4.664560392	5.77E-06
chr10	98176064	-4.664550461	5.77E-06
chr12	118837839	-4.664511468	5.77E-06
chr5	10287124	-4.664460378	5.77E-06
chr20	3378051	-4.664305945	5.77E-06
chr3	147074960	4.663972436	5.78E-06
chr1	226723547	-4.663150083	5.80E-06
chr14	105834088	-4.66309883	5.80E-06
chr17	90343	-4.663032973	5.81E-06
chr8	62762378	-4.662787519	5.81E-06
chr1	229245663	-4.66235071	5.82E-06
chr2	40155819	4.662189022	5.83E-06
chr10	128291860	-4.66193644	5.83E-06
chr17	77002989	-4.661619477	5.84E-06
chr7	382426	-4.661585248	5.84E-06
chr14	100059435	-4.661370412	5.85E-06
chr1	153196223	-4.661046119	5.86E-06
chr5	176075940	-4.660252333	5.88E-06
chr16	29389500	4.660012866	5.88E-06
chr10	105436976	-4.659687265	5.89E-06
chr3	163727138	-4.659574332	5.89E-06
chr4	144169980	-4.6595585	5.89E-06
chr3	195906881	-4.659360798	5.90E-06
chr7	910418	4.659249275	5.90E-06
chr1	116589222	-4.659061431	5.91E-06
chr4	141275148	-4.6589468	5.91E-06
chr11	66131852	-4.658688106	5.92E-06
chr11	10888512	-4.658417187	5.92E-06
chr6	119632160	4.657988458	5.94E-06
chr16	84073071	4.657687645	5.94E-06
chr3	9490169	-4.65759101	5.95E-06
chr1	12018309	-4.657364992	5.95E-06
chr14	94235973	-4.65729951	5.95E-06
chr13	113404107	-4.657239729	5.95E-06
chr14	70478521	-4.656760498	5.97E-06
chr3	195871716	4.656379256	5.98E-06
chr10	121090740	-4.65628874	5.98E-06
chr6	163743119	-4.655737385	5.99E-06
chr2	47175328	-4.655683536	6.00E-06
chr10	133240324	-4.655628945	6.00E-06
chr9	92000076	-4.655376023	6.00E-06
chr16	67027719	-4.655064631	6.01E-06
chr11	98634175	-4.654983907	6.01E-06
chr13	113465038	4.65437322	6.03E-06
chr8	145846281	-4.65435079	6.03E-06
chr10	62199195	-4.65427879	6.03E-06
chr10	3512545	-4.654198462	6.03E-06
chr10	91935358	-4.653944221	6.04E-06
chr17	37911392	4.653800538	6.04E-06
chr16	50718800	-4.653329942	6.06E-06
chr2	233735970	-4.653243866	6.06E-06
chr18	77641653	-4.653212014	6.06E-06
chr20	57457600	-4.653110246	6.06E-06
chr9	114738415	-4.653039454	6.07E-06
chr18	6270349	-4.652900415	6.07E-06
chr10	62199184	-4.65279908	6.07E-06
chr6	163656217	-4.652776808	6.07E-06
chr1	9356250	-4.65244826	6.08E-06
chr7	139416161	-4.652366958	6.08E-06
chr3	147130423	4.652254552	6.09E-06
chr1	43740667	-4.652092386	6.09E-06
chr7	5035513	-4.651452206	6.11E-06
chr1	849098	-4.65139814	6.11E-06
chr22	48723497	-4.650947305	6.12E-06
chr4	2824774	-4.650741832	6.13E-06
chr7	5035519	-4.650733437	6.13E-06
chr13	87540599	4.650658284	6.13E-06
chr18	12696416	4.650406217	6.14E-06
chr2	175537376	-4.650076717	6.14E-06
chr20	31048227	-4.650051419	6.14E-06
chr19	3492955	-4.649886192	6.15E-06
chr4	629259	-4.649543219	6.16E-06
chr2	25104743	-4.64911578	6.17E-06
chr2	222380066	4.649056557	6.17E-06
chr21	41798365	-4.64890554	6.18E-06
chr8	1786322	-4.64853518	6.19E-06
chr2	233528390	-4.648470207	6.19E-06
chr19	2650703	-4.647963088	6.20E-06
chr17	37911390	4.647900548	6.20E-06
chr17	1048361	4.647680582	6.21E-06
chr5	167645250	-4.647613667	6.21E-06
chr1	10591285	-4.647402897	6.22E-06
chr1	46879151	-4.647112914	6.22E-06
chr17	90341	-4.646913258	6.23E-06
chr4	24084006	-4.646535586	6.24E-06
chr11	7282962	-4.646532898	6.24E-06
chr16	88493853	-4.646464584	6.24E-06
chr1	9708568	-4.646461092	6.24E-06
chr1	23145246	-4.64641618	6.24E-06
chr5	178668156	-4.6460711	6.25E-06
chr19	46477698	-4.646029702	6.25E-06
chr2	3480638	-4.64599141	6.25E-06
chr16	88493850	-4.645921427	6.26E-06
chr16	27317590	4.645608683	6.26E-06
chr12	121895189	-4.645480867	6.27E-06
chr1	161964052	-4.645410774	6.27E-06
chr8	18473650	-4.64519092	6.28E-06
chr2	236049346	-4.645169753	6.28E-06
chr16	86029985	-4.645110634	6.28E-06
chr7	156407540	-4.644776576	6.29E-06
chr18	69620328	4.644427404	6.30E-06
chr17	75905997	-4.644273327	6.30E-06
chr10	121426068	-4.644272398	6.30E-06
chr1	23124349	-4.644232339	6.30E-06
chr3	100057983	-4.644113217	6.31E-06
chr9	110126265	-4.643953987	6.31E-06
chr5	95283910	-4.643645941	6.32E-06
chr14	64835256	4.643368372	6.33E-06
chr10	133890204	-4.643188252	6.33E-06
chr1	2358545	-4.643157723	6.33E-06
chr2	6127348	-4.643120497	6.33E-06
chr17	1845148	-4.643011141	6.34E-06
chr16	4451320	-4.642905392	6.34E-06
chr3	57145039	-4.642649976	6.35E-06
chr5	137058028	-4.642532293	6.35E-06
chr8	1831706	-4.642223491	6.36E-06
chr17	78838752	-4.642182052	6.36E-06
chr17	39875066	-4.642117765	6.36E-06
chr17	78986295	4.642102158	6.36E-06
chr1	991973	4.642081702	6.36E-06
chr14	106173820	-4.642034649	6.36E-06
chr9	71107810	4.641776972	6.37E-06
chr4	141207917	4.641655481	6.37E-06
chr4	119609516	-4.641169477	6.39E-06
chr2	186383917	4.641031471	6.39E-06
chr17	2737324	4.640819956	6.40E-06
chr6	4614653	-4.640665199	6.40E-06
chr7	137125841	-4.640633678	6.40E-06
chr17	18411200	-4.640330943	6.41E-06
chr6	163656182	-4.64029934	6.41E-06
chr1	203110865	-4.640232354	6.41E-06
chr11	70483023	-4.639594202	6.43E-06
chr8	1830128	-4.639495485	6.43E-06
chr16	87742305	4.639482715	6.43E-06
chr3	43907536	-4.639477041	6.43E-06
chr6	32117029	4.639446481	6.43E-06
chr7	130418201	4.639303403	6.44E-06
chr12	23088315	4.639216876	6.44E-06
chr15	29227114	-4.639176334	6.44E-06
chr10	134419549	-4.639038272	6.45E-06
chr9	97844301	-4.638487701	6.46E-06
chr11	64854471	-4.638236467	6.47E-06
chr8	143186987	-4.638006042	6.48E-06
chr1	23145265	-4.637689121	6.48E-06
chr18	43676722	4.637688313	6.48E-06
chr10	81151820	-4.63762482	6.49E-06
chr4	57653841	4.637531799	6.49E-06
chr16	50718818	-4.637358625	6.49E-06
chr10	134387529	4.636817053	6.51E-06
chr7	157577407	-4.636710162	6.51E-06
chr13	25771094	-4.636558671	6.52E-06
chr17	43829085	-4.636513303	6.52E-06
chr3	71021727	-4.636503349	6.52E-06
chr5	110208059	-4.636451745	6.52E-06
chr16	4451330	-4.636292574	6.52E-06
chr15	92611389	-4.636291311	6.52E-06
chr11	120480892	-4.636281231	6.52E-06
chr15	101848070	-4.635603983	6.54E-06
chr20	22200107	-4.635510888	6.55E-06
chr13	49878601	-4.635309568	6.55E-06
chr1	26881452	-4.635153205	6.56E-06
chr22	45906104	-4.635002139	6.56E-06
chr19	2717427	4.634923373	6.56E-06
chr9	88423095	-4.634432162	6.58E-06
chr13	30909625	-4.634314879	6.58E-06
chr7	47866938	-4.634271518	6.58E-06
chr11	55745136	4.634127795	6.59E-06
chr18	56267558	4.634034855	6.59E-06
chr10	87367417	-4.633647208	6.60E-06
chr2	47218297	-4.633580412	6.60E-06
chr5	42887465	-4.633568232	6.60E-06
chr4	146813446	-4.633480547	6.60E-06
chr11	43953964	-4.633477014	6.60E-06
chr4	629257	-4.633474345	6.60E-06
chr12	128674829	-4.633318935	6.61E-06
chr7	5035496	-4.632291359	6.64E-06
chr6	2481120	-4.632204418	6.64E-06
chr5	536100	-4.632201089	6.64E-06
chr14	37053416	4.631845844	6.65E-06
chr11	2130516	-4.630996746	6.68E-06
chr5	178741151	-4.630620666	6.69E-06
chr14	88769889	-4.630418622	6.69E-06
chr3	188131287	-4.630335412	6.70E-06
chr16	72588852	-4.629979689	6.71E-06
chr1	65323636	-4.629891879	6.71E-06
chr16	85260177	-4.629881002	6.71E-06
chr8	38176894	-4.629870701	6.71E-06
chr7	137154785	-4.629301976	6.73E-06
chr2	218694896	-4.629199282	6.73E-06
chr1	4832546	4.628769717	6.74E-06
chr20	44032067	-4.628723464	6.74E-06
chr1	991998	4.62865719	6.74E-06
chr6	3469130	-4.627804094	6.77E-06
chr21	32627508	-4.627787444	6.77E-06
chr6	154794716	-4.627546943	6.78E-06
chr2	123853031	-4.627480144	6.78E-06
chr8	18473648	-4.627456605	6.78E-06
chr16	12602875	-4.627186135	6.79E-06
chr22	50857463	-4.627131627	6.79E-06
chr10	39116961	4.627037346	6.79E-06
chr17	77402774	4.627026049	6.79E-06
chr2	241633129	-4.627004671	6.79E-06
chr2	234223437	-4.626910915	6.80E-06
chr10	60381565	-4.626904903	6.80E-06
chr15	31496159	-4.62690322	6.80E-06
chr10	128155909	-4.626693459	6.80E-06
chr4	90196956	-4.626569463	6.81E-06
chr9	124767484	-4.626424842	6.81E-06
chr19	57202225	-4.626334249	6.81E-06
chr1	9362005	-4.626326188	6.81E-06
chr19	30921438	-4.626320521	6.81E-06
chr15	51669471	-4.626196237	6.82E-06
chr17	61564491	-4.62607654	6.82E-06
chr1	240650587	4.625760902	6.83E-06
chr17	62659425	-4.625027197	6.85E-06
chr10	665304	-4.624905477	6.85E-06
chr12	124880535	-4.624811982	6.86E-06
chr2	121355259	-4.624771183	6.86E-06
chr1	161964090	-4.624478239	6.87E-06
chr5	55248559	-4.62445744	6.87E-06
chr12	13243886	4.624345462	6.87E-06
chr7	157416453	-4.624249171	6.87E-06
chr20	22200128	-4.624043191	6.88E-06
chr1	160032379	-4.624007701	6.88E-06
chr9	131647394	-4.62399688	6.88E-06
chr13	41139096	-4.623987306	6.88E-06
chr6	132916416	-4.623916542	6.88E-06
chr1	200344568	-4.623540709	6.90E-06
chr8	143316683	-4.623314547	6.90E-06
chr10	3512550	-4.62317237	6.91E-06
chr10	129145846	-4.623081233	6.91E-06
chr3	48460219	-4.623023528	6.91E-06
chr20	59549330	-4.622672165	6.92E-06
chr14	49477587	4.622478858	6.93E-06
chr21	45534637	4.621716179	6.95E-06
chr5	145719841	4.621592951	6.95E-06
chr7	28825592	-4.621446092	6.96E-06
chr13	114901632	-4.621244021	6.96E-06
chr20	22200122	-4.621189082	6.97E-06
chr9	6730811	-4.620785657	6.98E-06
chr20	22200131	-4.620693986	6.98E-06
chr2	72356240	-4.620629477	6.98E-06
chr11	34534359	-4.620449442	6.99E-06
chr16	86029924	-4.620072991	7.00E-06
chr11	17799416	4.619701033	7.01E-06
chr11	70995520	-4.619226412	7.03E-06
chr1	10591270	-4.619099111	7.03E-06
chr1	15342694	-4.619051129	7.03E-06
chr7	67753567	-4.618944258	7.03E-06
chr6	33358615	-4.618801872	7.04E-06
chr10	133676527	-4.618714861	7.04E-06
chr6	2191060	-4.618653602	7.04E-06
chr9	124767505	-4.61840303	7.05E-06
chr19	22878394	4.618130679	7.06E-06
chr13	36304881	-4.617504215	7.08E-06
chr18	59157952	-4.617488088	7.08E-06
chr19	31118660	-4.617320137	7.08E-06
chr9	126755446	4.616667296	7.10E-06
chr11	63856644	-4.616643228	7.11E-06
chr2	113479873	-4.616397389	7.11E-06
chr15	66858202	-4.616190239	7.12E-06
chr19	36615548	4.616074091	7.12E-06
chr10	105379980	-4.615950391	7.13E-06
chr17	6665337	-4.615850495	7.13E-06
chr20	46391000	-4.6157754	7.13E-06
chr2	71819190	-4.615754978	7.13E-06
chr10	81173146	-4.615576497	7.14E-06
chr17	76455582	-4.615447545	7.14E-06
chr2	236212765	-4.615363661	7.14E-06
chr21	41033913	-4.615234111	7.15E-06
chr2	242799857	-4.615106786	7.15E-06
chr10	1232023	-4.614877094	7.16E-06
chr9	73110544	-4.614865576	7.16E-06
chr5	176808727	4.614831277	7.16E-06
chr20	3727195	4.614780727	7.16E-06
chr1	240650557	4.614304427	7.18E-06
chr16	29333181	-4.613996046	7.19E-06
chr10	129096120	-4.61386263	7.19E-06
chr19	19531564	-4.613813562	7.19E-06
chr16	11659492	-4.613233074	7.21E-06
chr2	240054328	-4.613141036	7.21E-06
chr17	78357018	4.612731803	7.23E-06
chr2	233213	-4.612549541	7.23E-06
chr12	133124341	-4.612423004	7.24E-06
chr20	60240297	-4.612336319	7.24E-06
chr1	92557114	4.612299569	7.24E-06
chr10	134505289	4.612169153	7.24E-06
chr8	62762416	-4.612124643	7.25E-06
chr10	82289617	4.611686987	7.26E-06
chr6	169407969	-4.611618117	7.26E-06
chr12	132631662	-4.611541726	7.26E-06
chr20	56725418	-4.61146515	7.27E-06
chr2	19320893	-4.611406621	7.27E-06
chr3	49820911	-4.611400093	7.27E-06
chr1	21589468	-4.611087804	7.28E-06
chr16	74444274	-4.610980421	7.28E-06
chr3	25721063	-4.610749486	7.29E-06
chr1	991982	4.610671496	7.29E-06
chr3	63976483	-4.61028633	7.30E-06
chr12	114329701	-4.610285001	7.30E-06
chr16	907578	4.610008839	7.31E-06
chr19	35790203	-4.609848189	7.32E-06
chr8	37401023	-4.609665981	7.32E-06
chr17	76127378	-4.609640252	7.32E-06
chr7	152438800	-4.6094839	7.33E-06
chr4	22338621	-4.609419951	7.33E-06
chr6	169629714	-4.609392757	7.33E-06
chr4	2824731	-4.609383849	7.33E-06
chr14	103777810	-4.609310463	7.33E-06
chr16	85260190	-4.609156342	7.34E-06
chr16	88493840	-4.609089966	7.34E-06
chr1	17121703	-4.60873657	7.35E-06
chr9	109384006	-4.608720732	7.35E-06
chr21	46783654	-4.608572495	7.36E-06
chr14	101712322	-4.608454859	7.36E-06
chr19	42393252	-4.608348845	7.37E-06
chr7	16445843	-4.608260802	7.37E-06
chr7	66130868	-4.608117869	7.37E-06
chr19	578176	4.608060519	7.37E-06
chr5	126508602	-4.607977675	7.38E-06
chr10	12676735	-4.607919571	7.38E-06
chr19	13490662	4.607815461	7.38E-06
chr11	118468483	-4.607777012	7.38E-06
chr3	184356677	-4.607630971	7.39E-06
chr17	3195642	-4.607443853	7.39E-06
chr11	1431410	4.607403005	7.40E-06
chr9	97689801	-4.607217221	7.40E-06
chr13	111903526	-4.607071291	7.41E-06
chr16	68830375	-4.606948216	7.41E-06
chr13	42107426	-4.606942987	7.41E-06
chr8	25138751	-4.606853422	7.41E-06
chr13	42107431	-4.606826459	7.41E-06
chr19	6690774	-4.606661053	7.42E-06
chr13	113465053	4.606642345	7.42E-06
chr11	16341387	4.606536641	7.42E-06
chr9	139409928	-4.606356315	7.43E-06
chr7	51222313	-4.606171091	7.43E-06
chr1	27775706	-4.60600767	7.44E-06
chr14	94200643	-4.605611801	7.45E-06
chr18	77268328	-4.60551979	7.46E-06
chr5	130915844	-4.605472983	7.46E-06
chr3	195900576	-4.605297747	7.46E-06
chr19	30921422	-4.605085031	7.47E-06
chr11	102114130	4.605063255	7.47E-06
chr11	64420169	-4.60506048	7.47E-06
chr16	81647874	-4.604587689	7.49E-06
chr2	236885772	-4.604238577	7.50E-06
chr14	105962171	-4.604183427	7.50E-06
chr1	204236623	-4.604059923	7.50E-06
chr7	155625022	-4.604008102	7.50E-06
chr9	110463080	-4.603895272	7.51E-06
chr20	58298745	-4.603796148	7.51E-06
chr3	13462853	-4.603559012	7.52E-06
chr22	45906087	-4.603313513	7.53E-06
chr20	44032080	-4.603304552	7.53E-06
chr10	60381582	-4.602799402	7.54E-06
chr6	132916401	-4.602413365	7.56E-06
chr3	21599907	4.601924308	7.57E-06
chr17	80879511	4.601914443	7.57E-06
[truncated: 98,004 more rows]
